# Supplementary material for: Grainyhead 1 acts as a drug-inducible conserved transcriptional regulator linked to insulin signaling and lifespan
Source: PubMed Central journal article supplement (PMC8748497; doi:10.1038/s41467-021-27732-4), 2022-01-10

# Supplementary Data 7. XICs of GRHL1 post-translational modifications associated with papaverine treatment.

R9 - MTQEY[+80]DNK[+114]R[+28]PVLVLQNEALYPQR

D1-3 = DMSO

PH1-3 = Papaverine

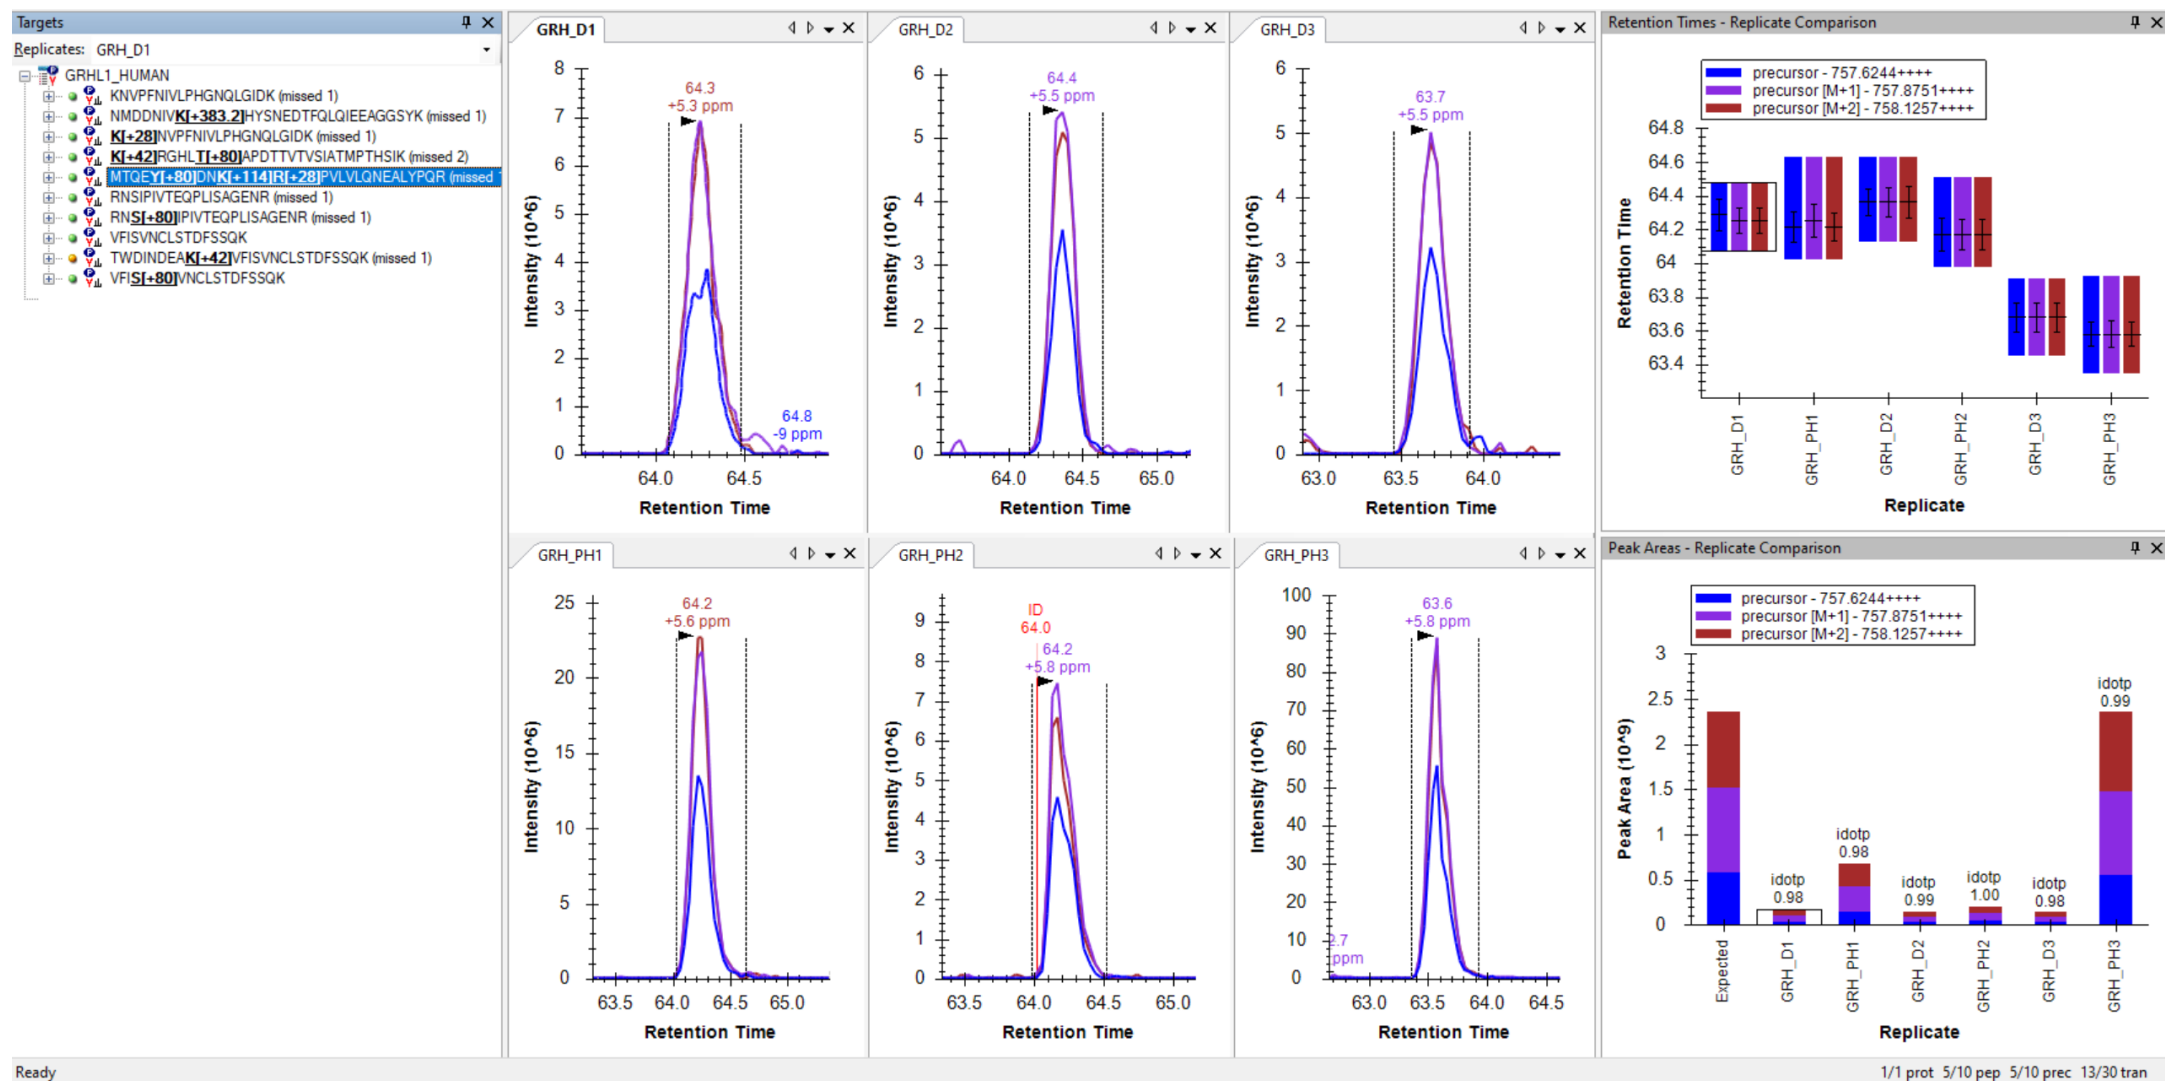

# Supplementary Data 7. XICs of GRHL1 post-translational modifications associated with papaverine treatment.

## S95 (unmodified) – RNSIPIVTEQPLISAGENR

D1-3 = DMSO

PH1-3 = Papaverine

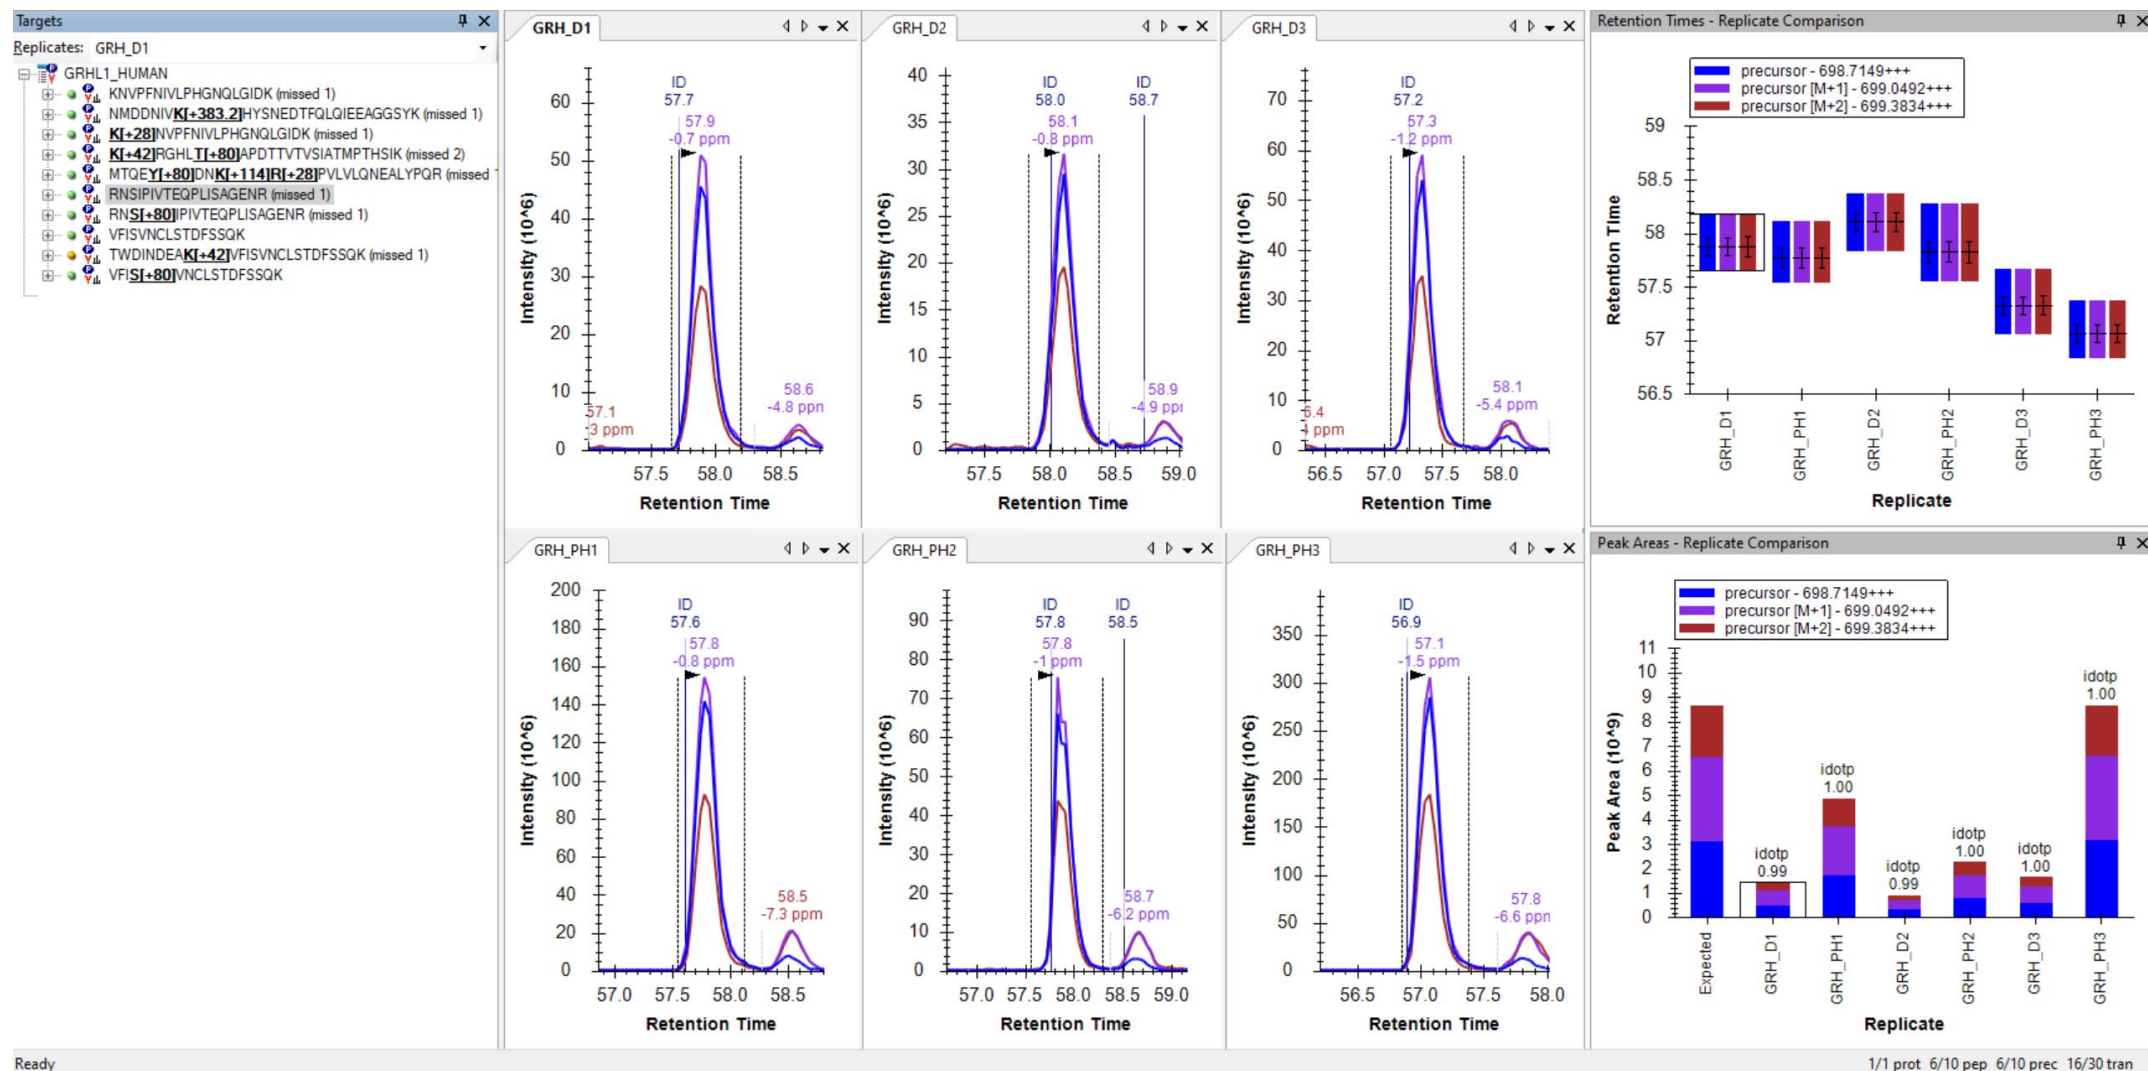

# Supplementary Data 7. XICs of GRHL1 post-translational modifications associated with papaverine treatment.

S95 - RNS[+80]IPIVTEQPLISAGENR

D1-3 = DMSO

PH1-3 = Papaverine

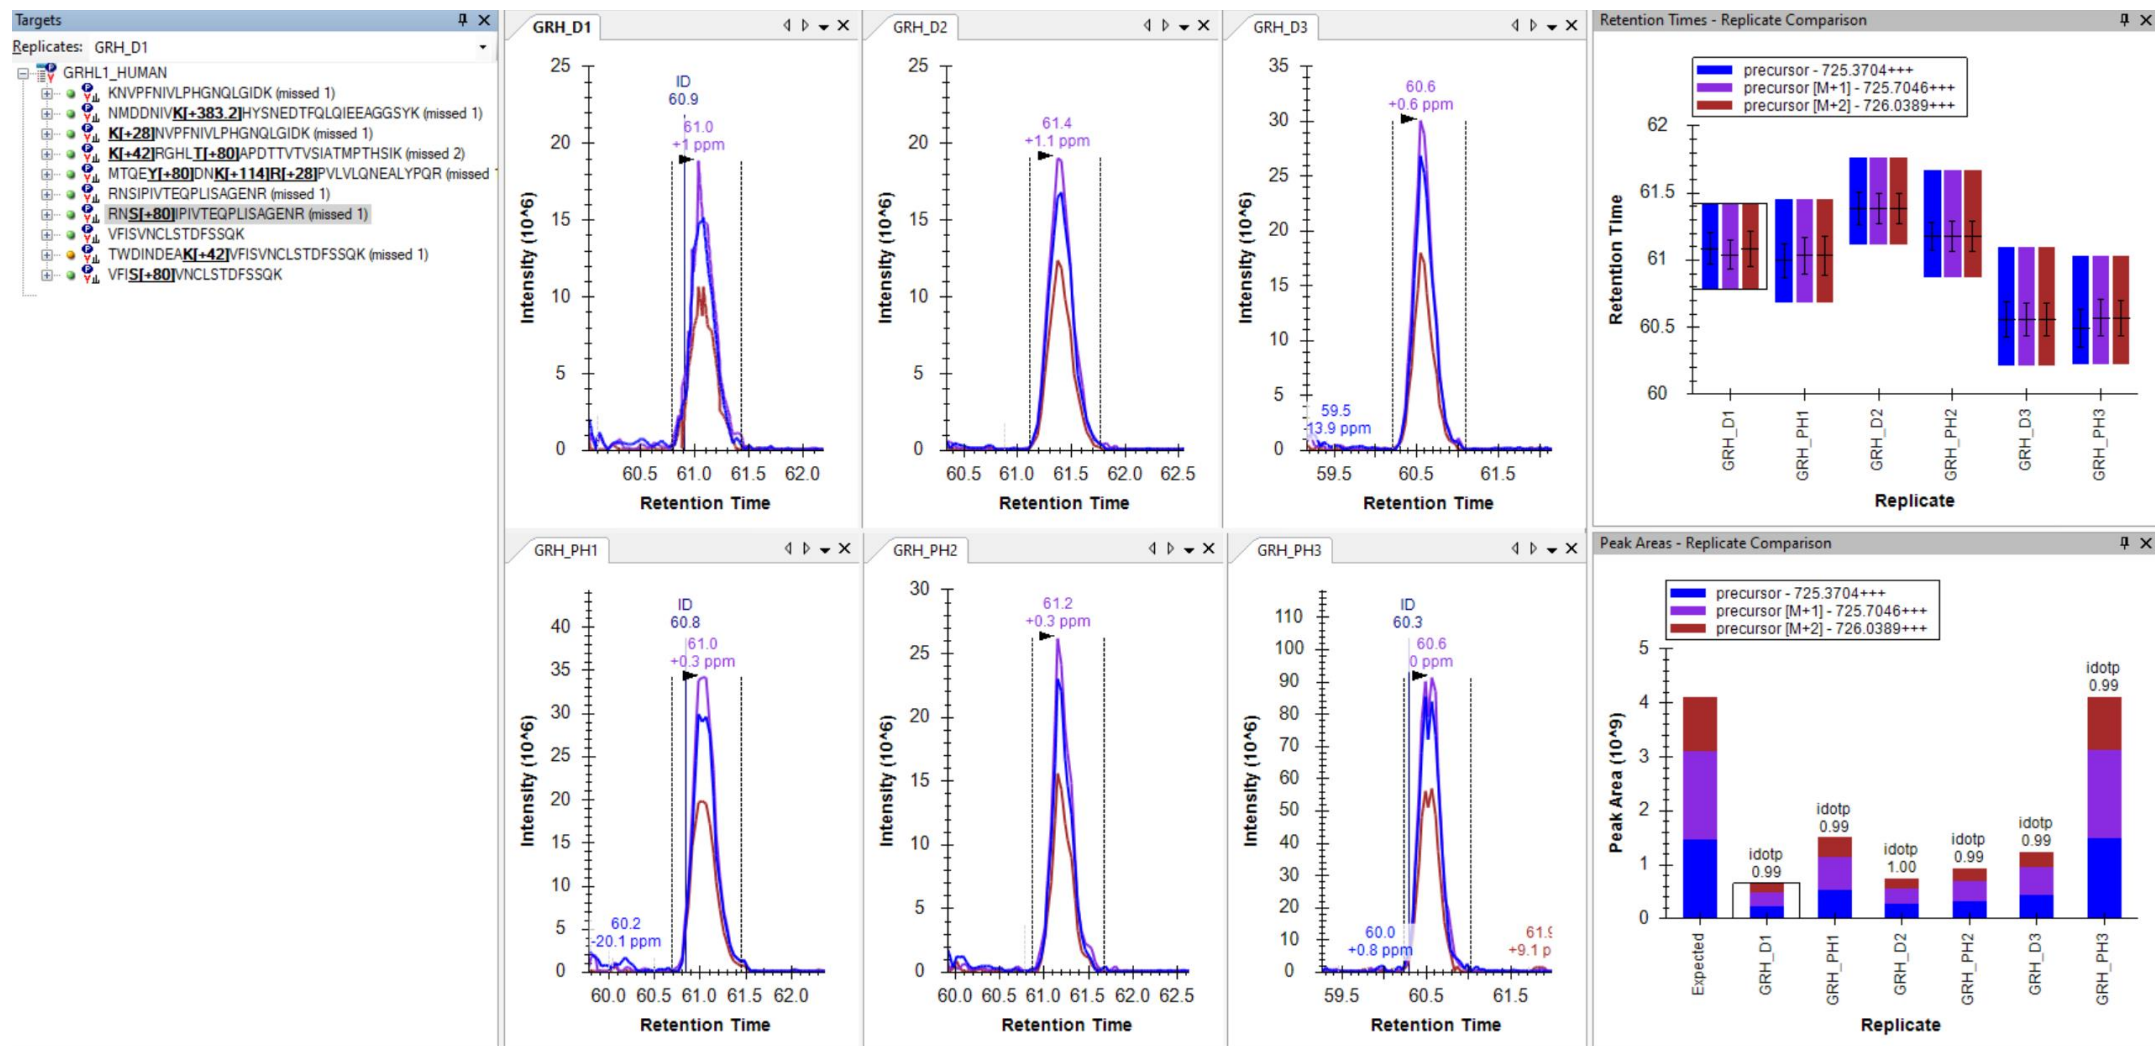

# Supplementary Data 7. XICs of GRHL1 post-translational modifications associated with papaverine treatment.

## K116 (unmodified) – KNVFPNIVLPHGNQLGIDK

D1-3 = DMSO

PH1-3 = Papaverine

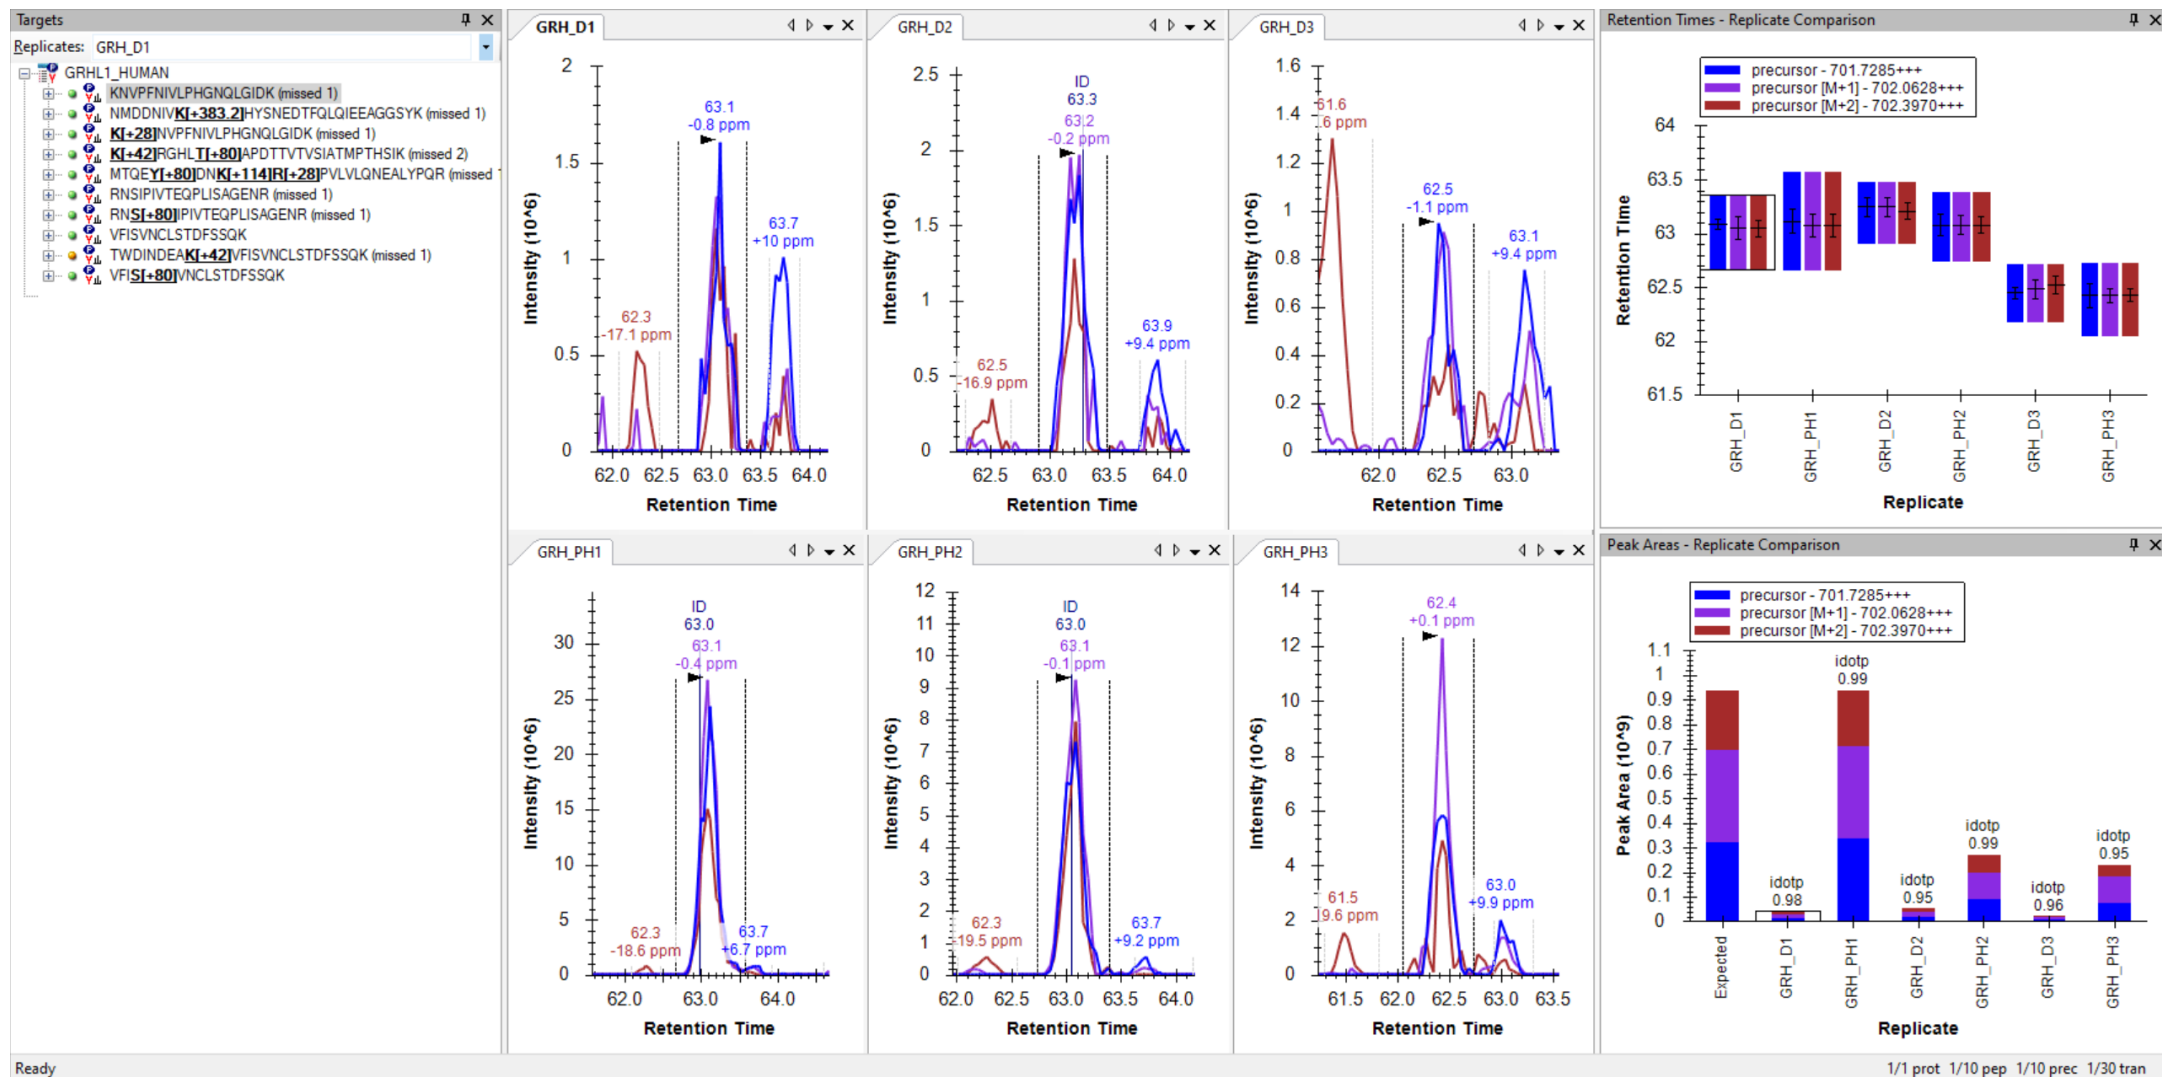

# Supplementary Data 7. XICs of GRHL1 post-translational modifications associated with papaverine treatment.

**K116 - K[+28]NVPFNIVLPHGNQLGIDK**

D1-3 = DMSO

PH1-3 = Papaverine

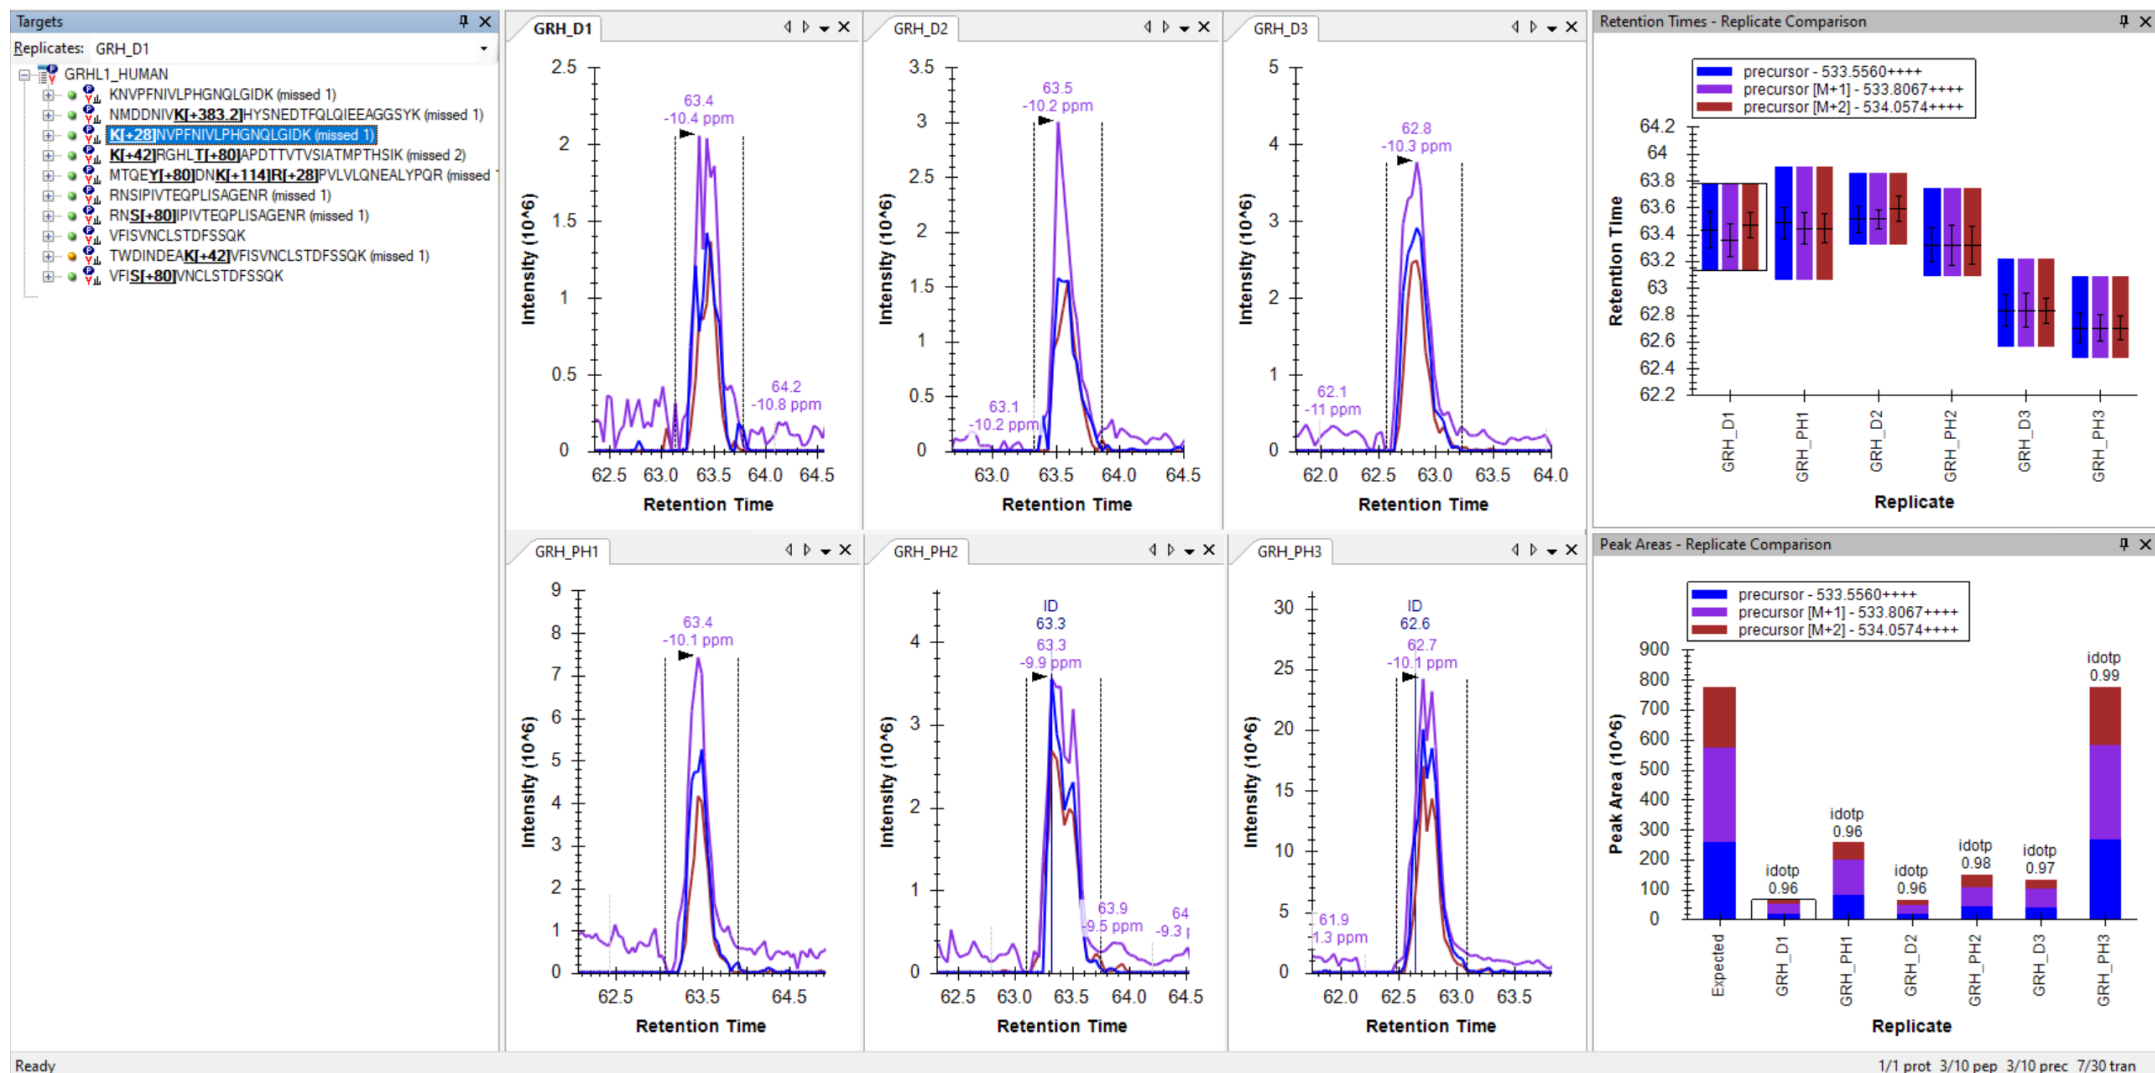

# Supplementary Data 7. XICs of GRHL1 post-translational modifications associated with papaverine treatment.

T139 - K[+42]RGHLT[+80]APDTT<sup>TV</sup>VS<sup>IAT</sup>MP<sup>TH</sup>SIK

D1-3 = DMSO

PH1-3 = Papaverine

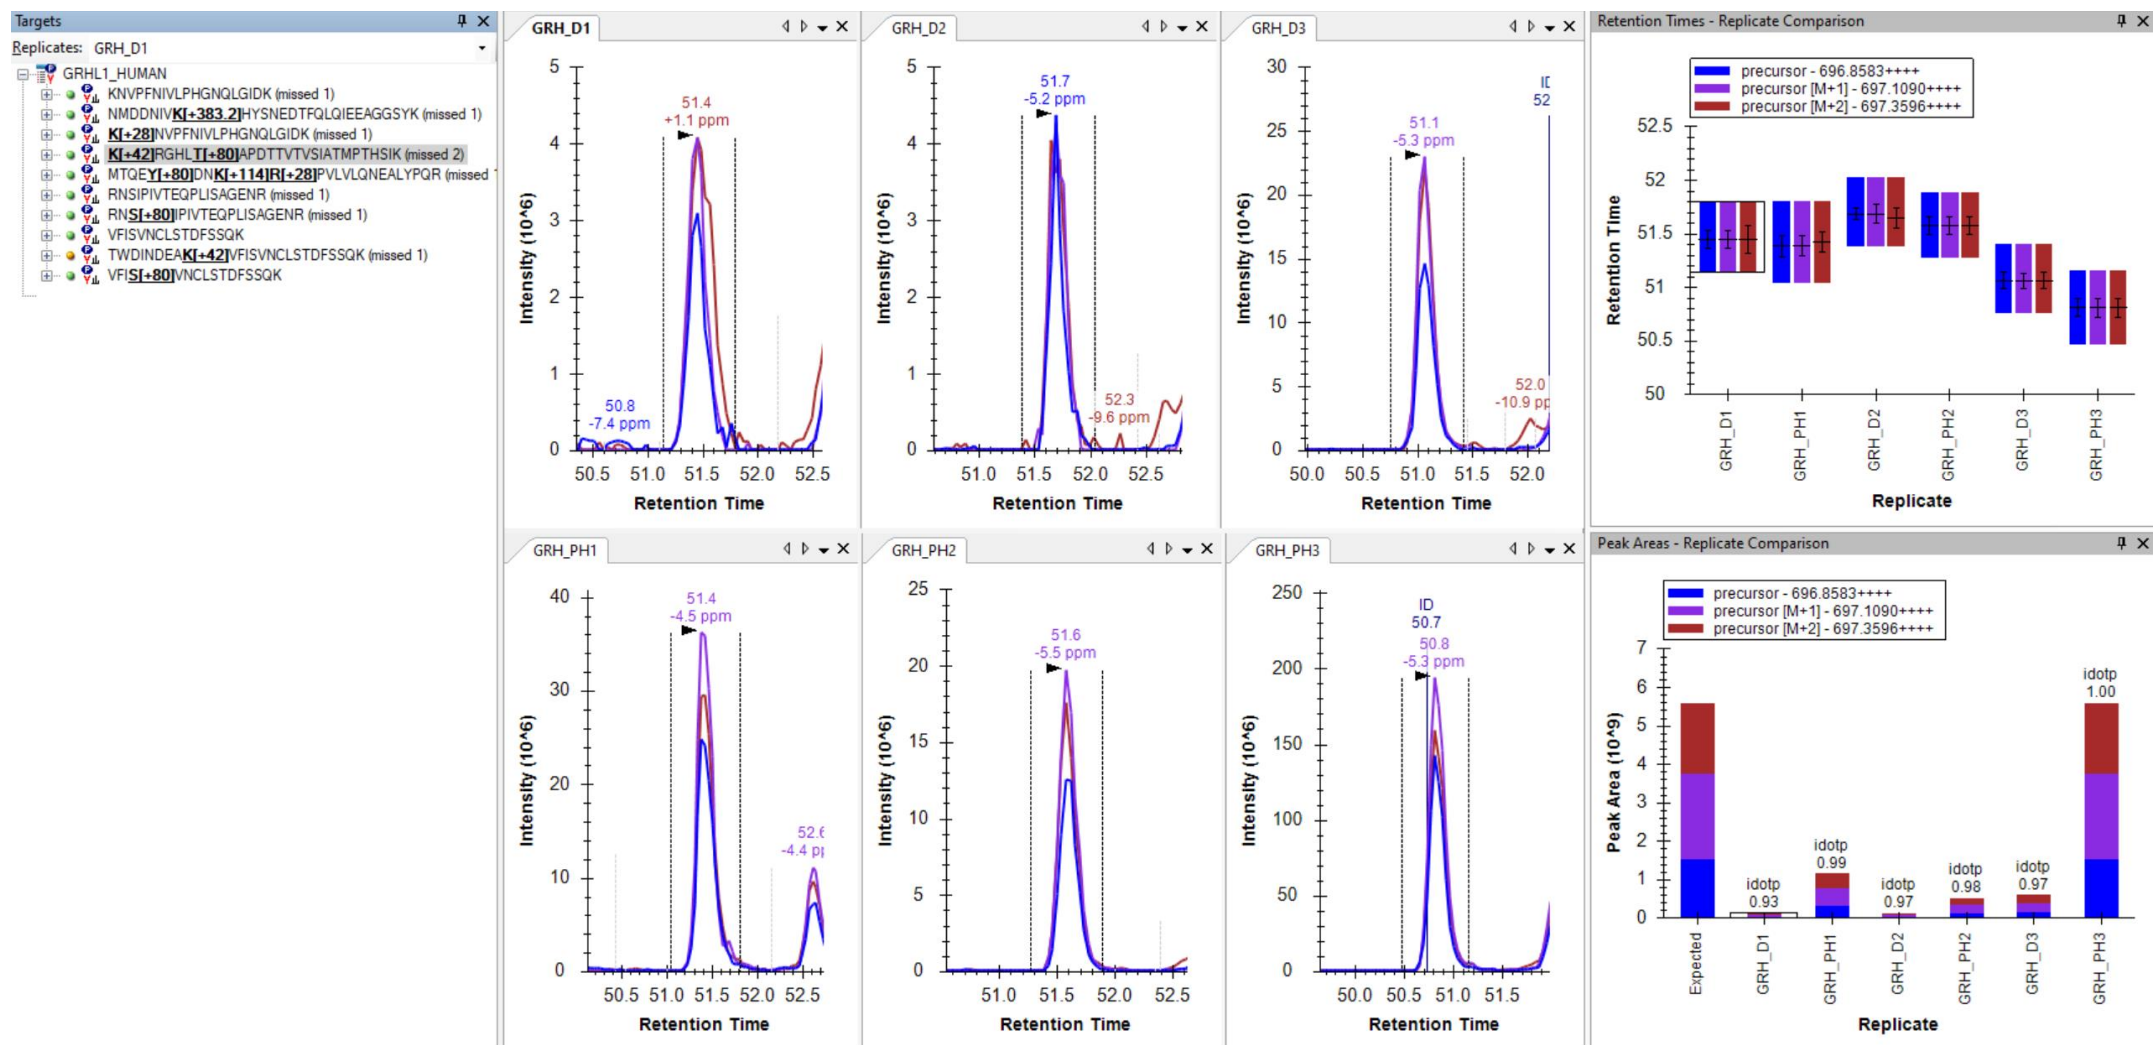

# Supplementary Data 7. XICs of GRHL1 post-translational modifications associated with papaverine treatment.

**K370 – TWDINDEAK[+42]VFISVNCLSTDFSSQK**

D1-3 = DMSO

PH1-3 = Papaverine

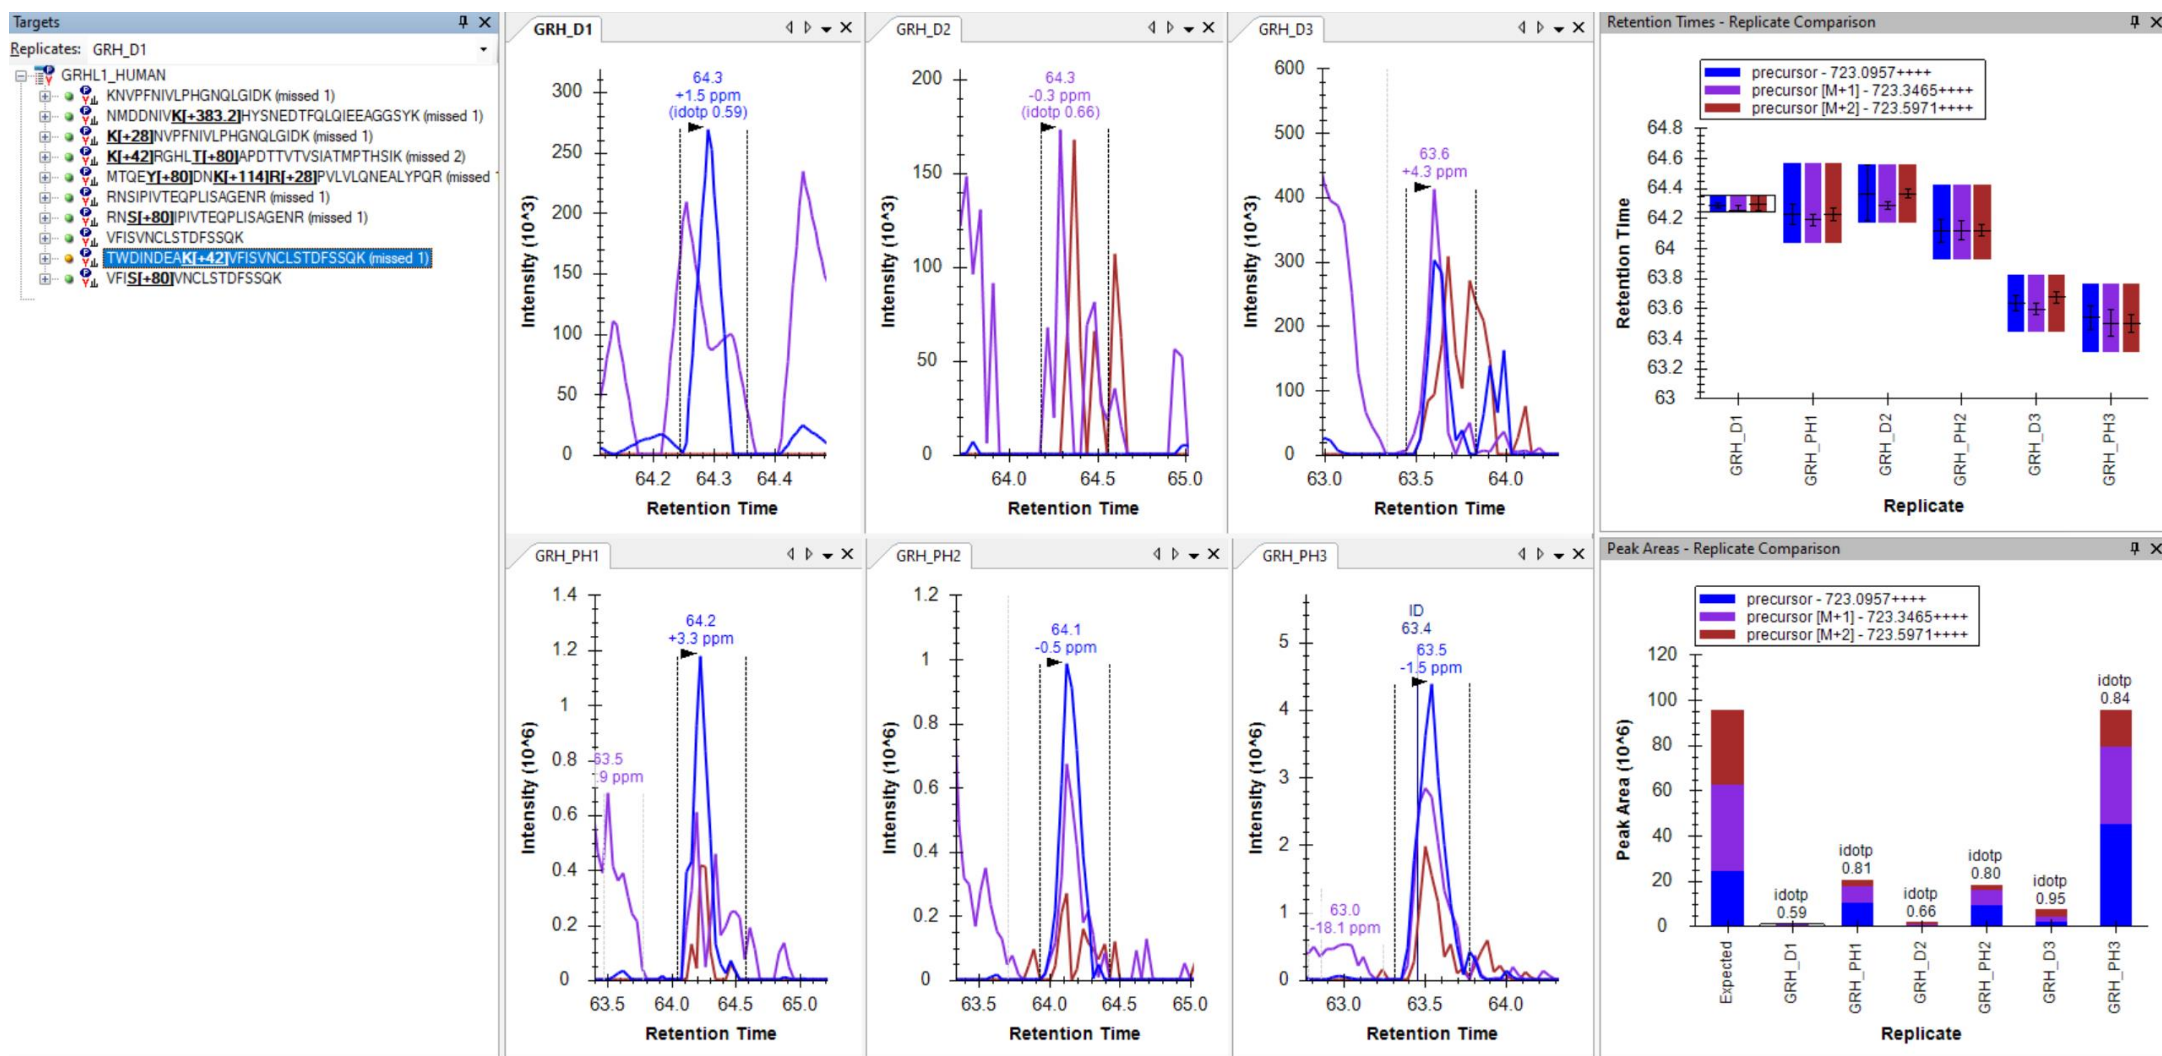

# Supplementary Data 7. XICs of GRHL1 post-translational modifications associated with papaverine treatment.

## S374 (unmodified) – VFISVNCLSTDFSSQK

D1-3 = DMSO

PH1-3 = Papaverine

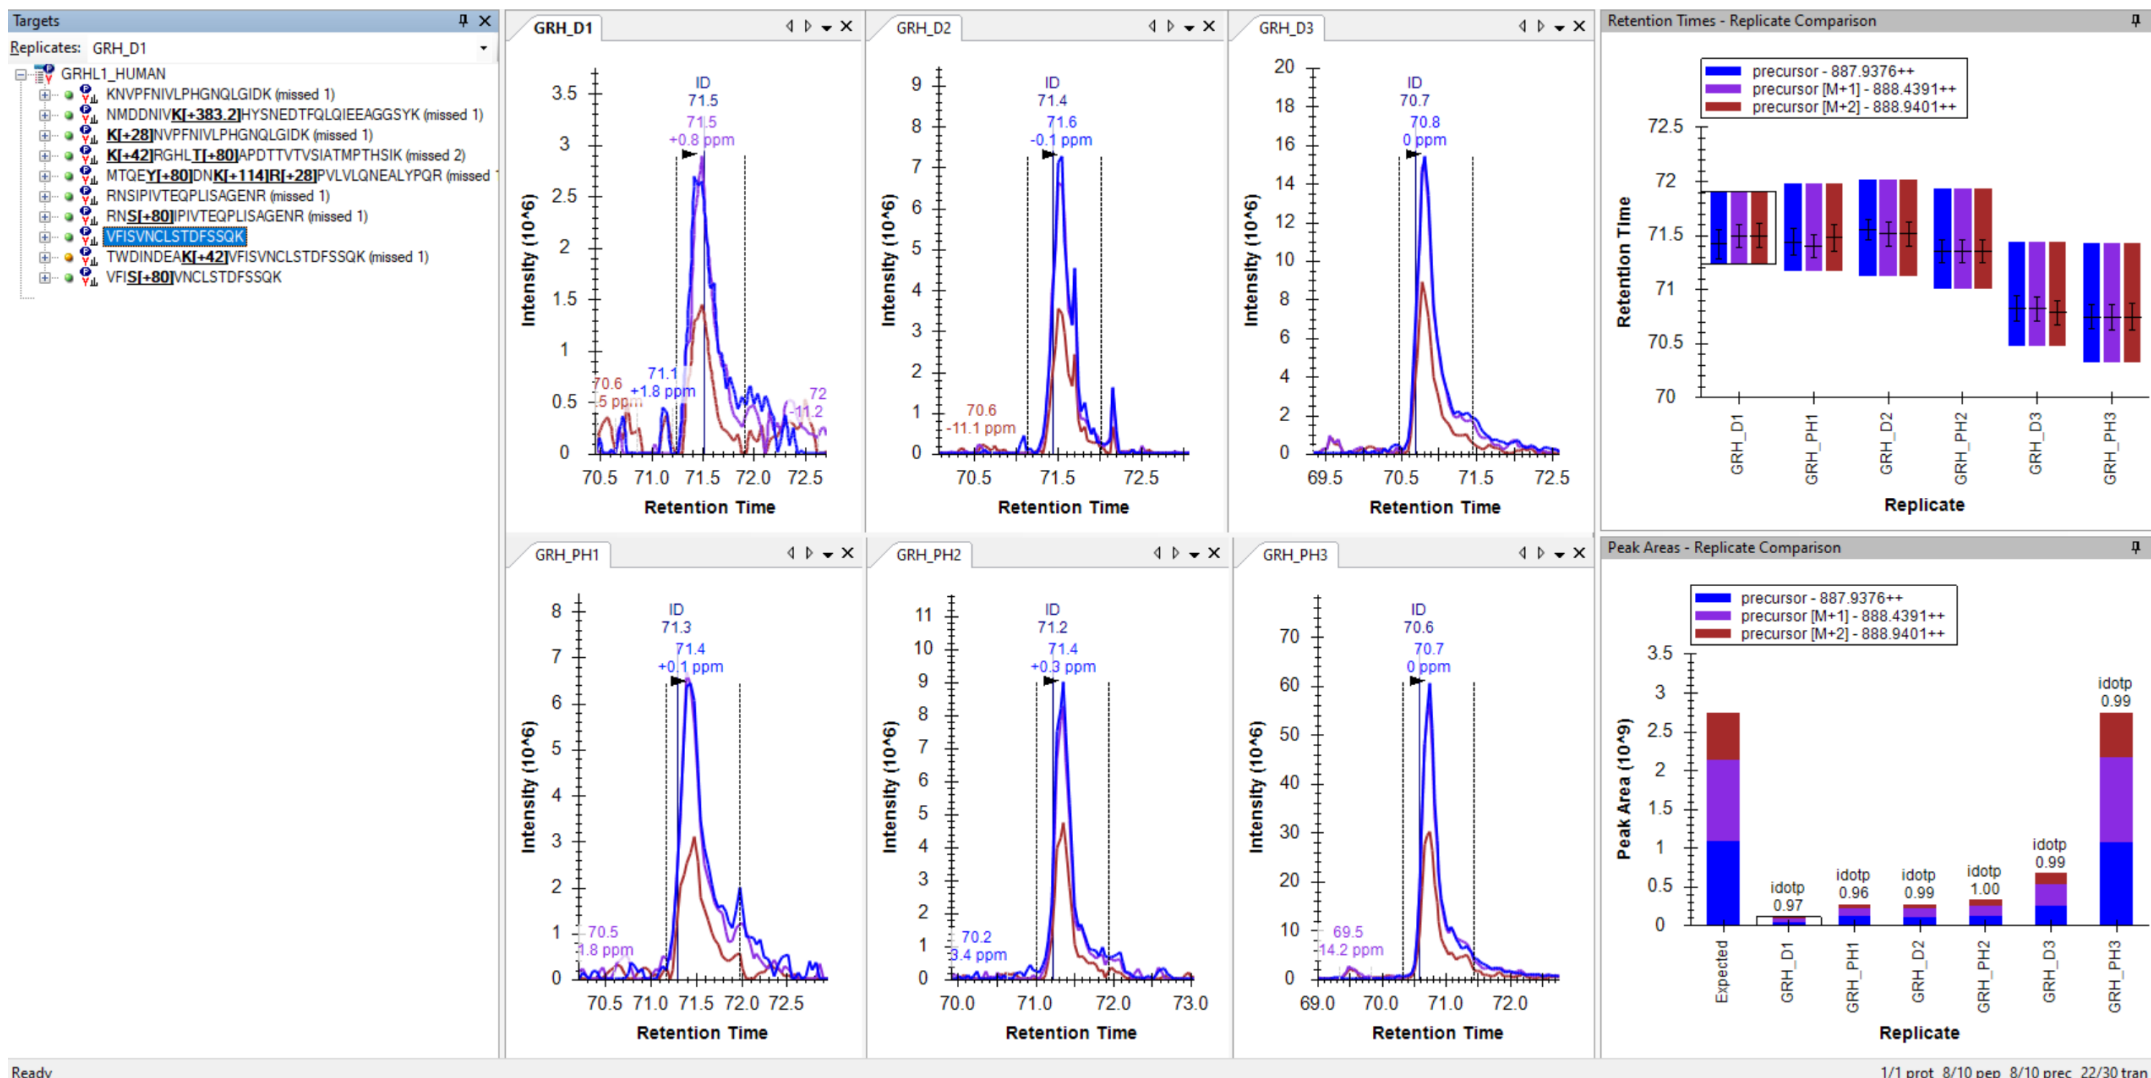



# Supplementary Data 7. XICs of GRHL1 post-translational modifications associated with papaverine treatment.

**S374 - VFIS[+80]VNCLSTDFSSQK**

D1-3 = DMSO

PH1-3 = Papaverine

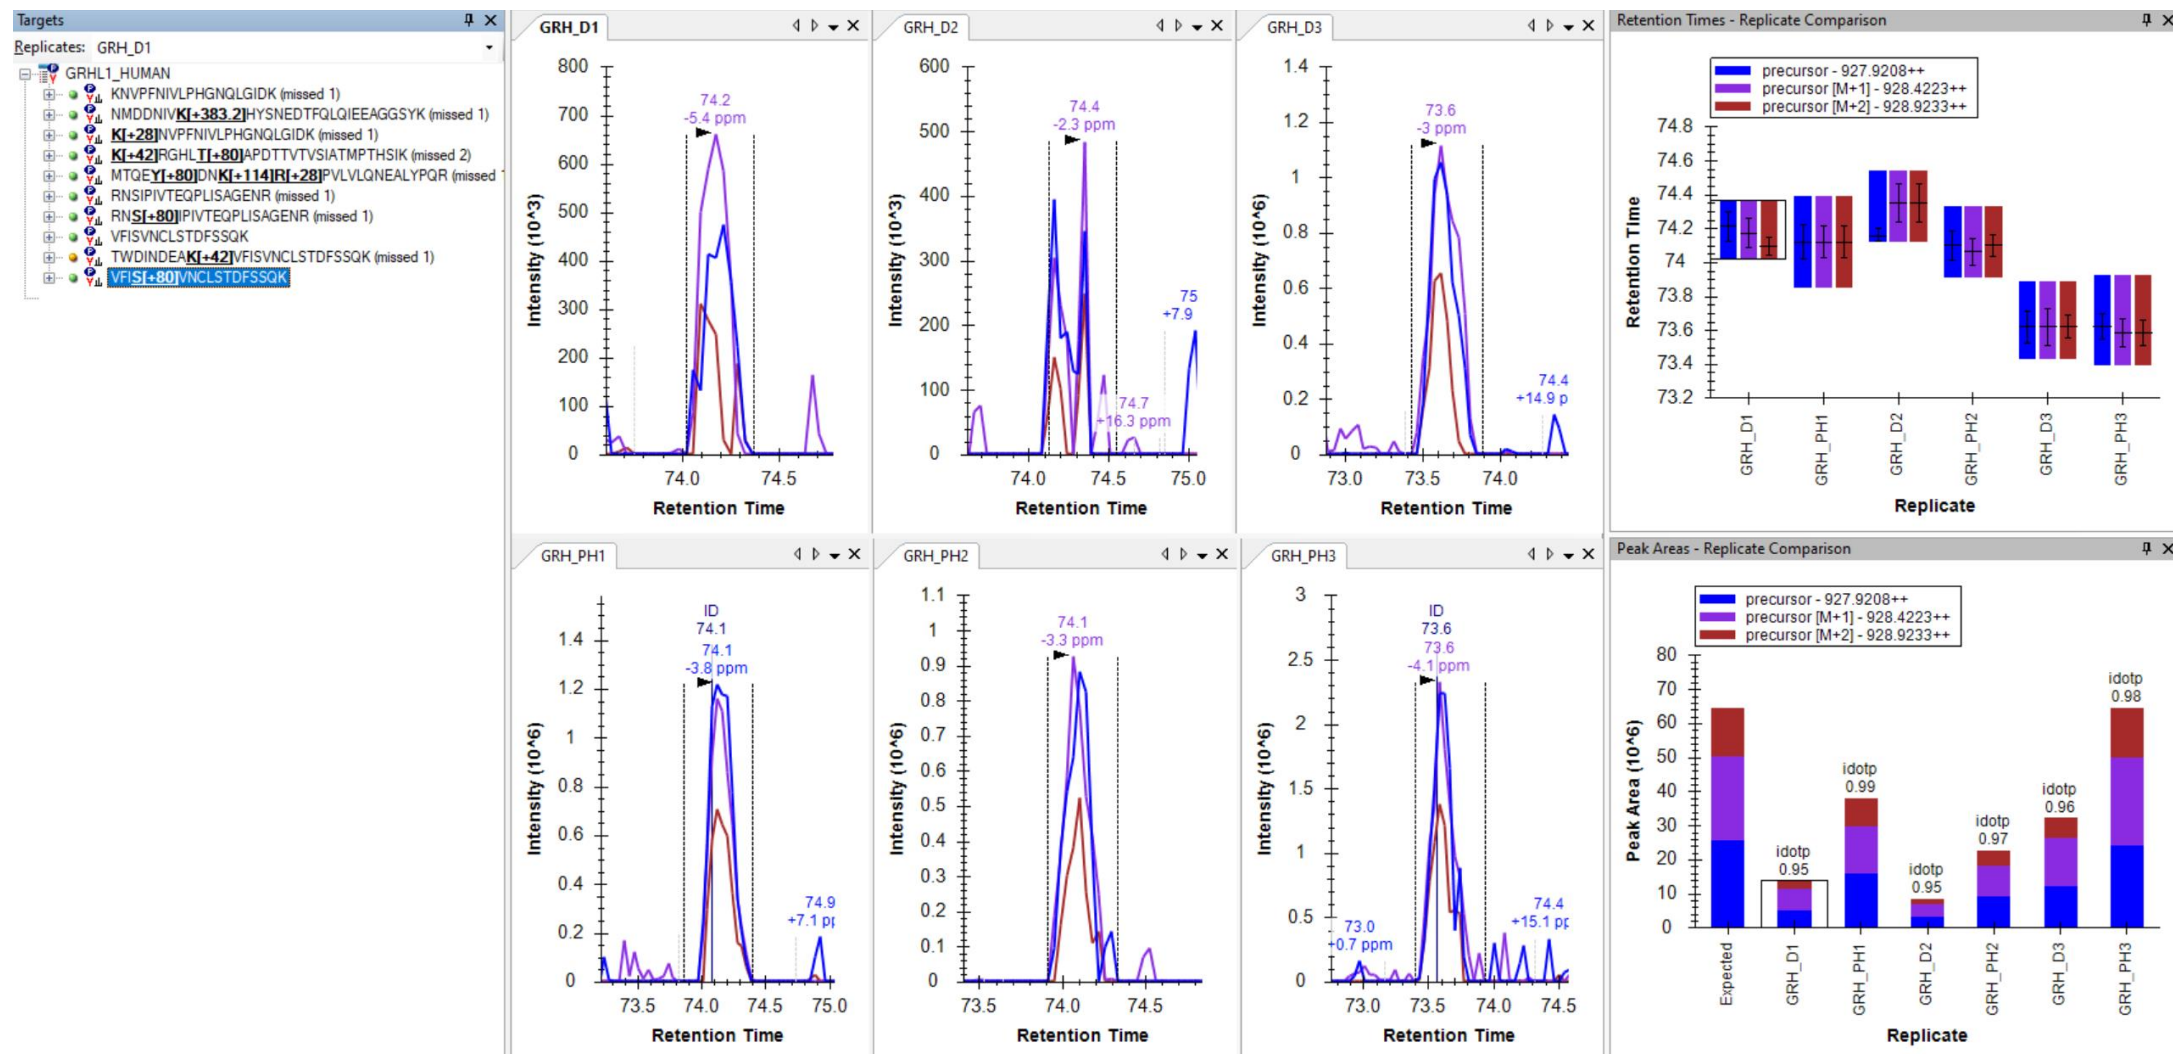

# Supplementary Data 7. XICs of GRHL1 post-translational modifications associated with papaverine treatment.

**K592 – NMDDNIVK[+383.2]HYSNEDTFQLQIEEAGGSYK**

D1-3 = DMSO

PH1-3 = Papaverine

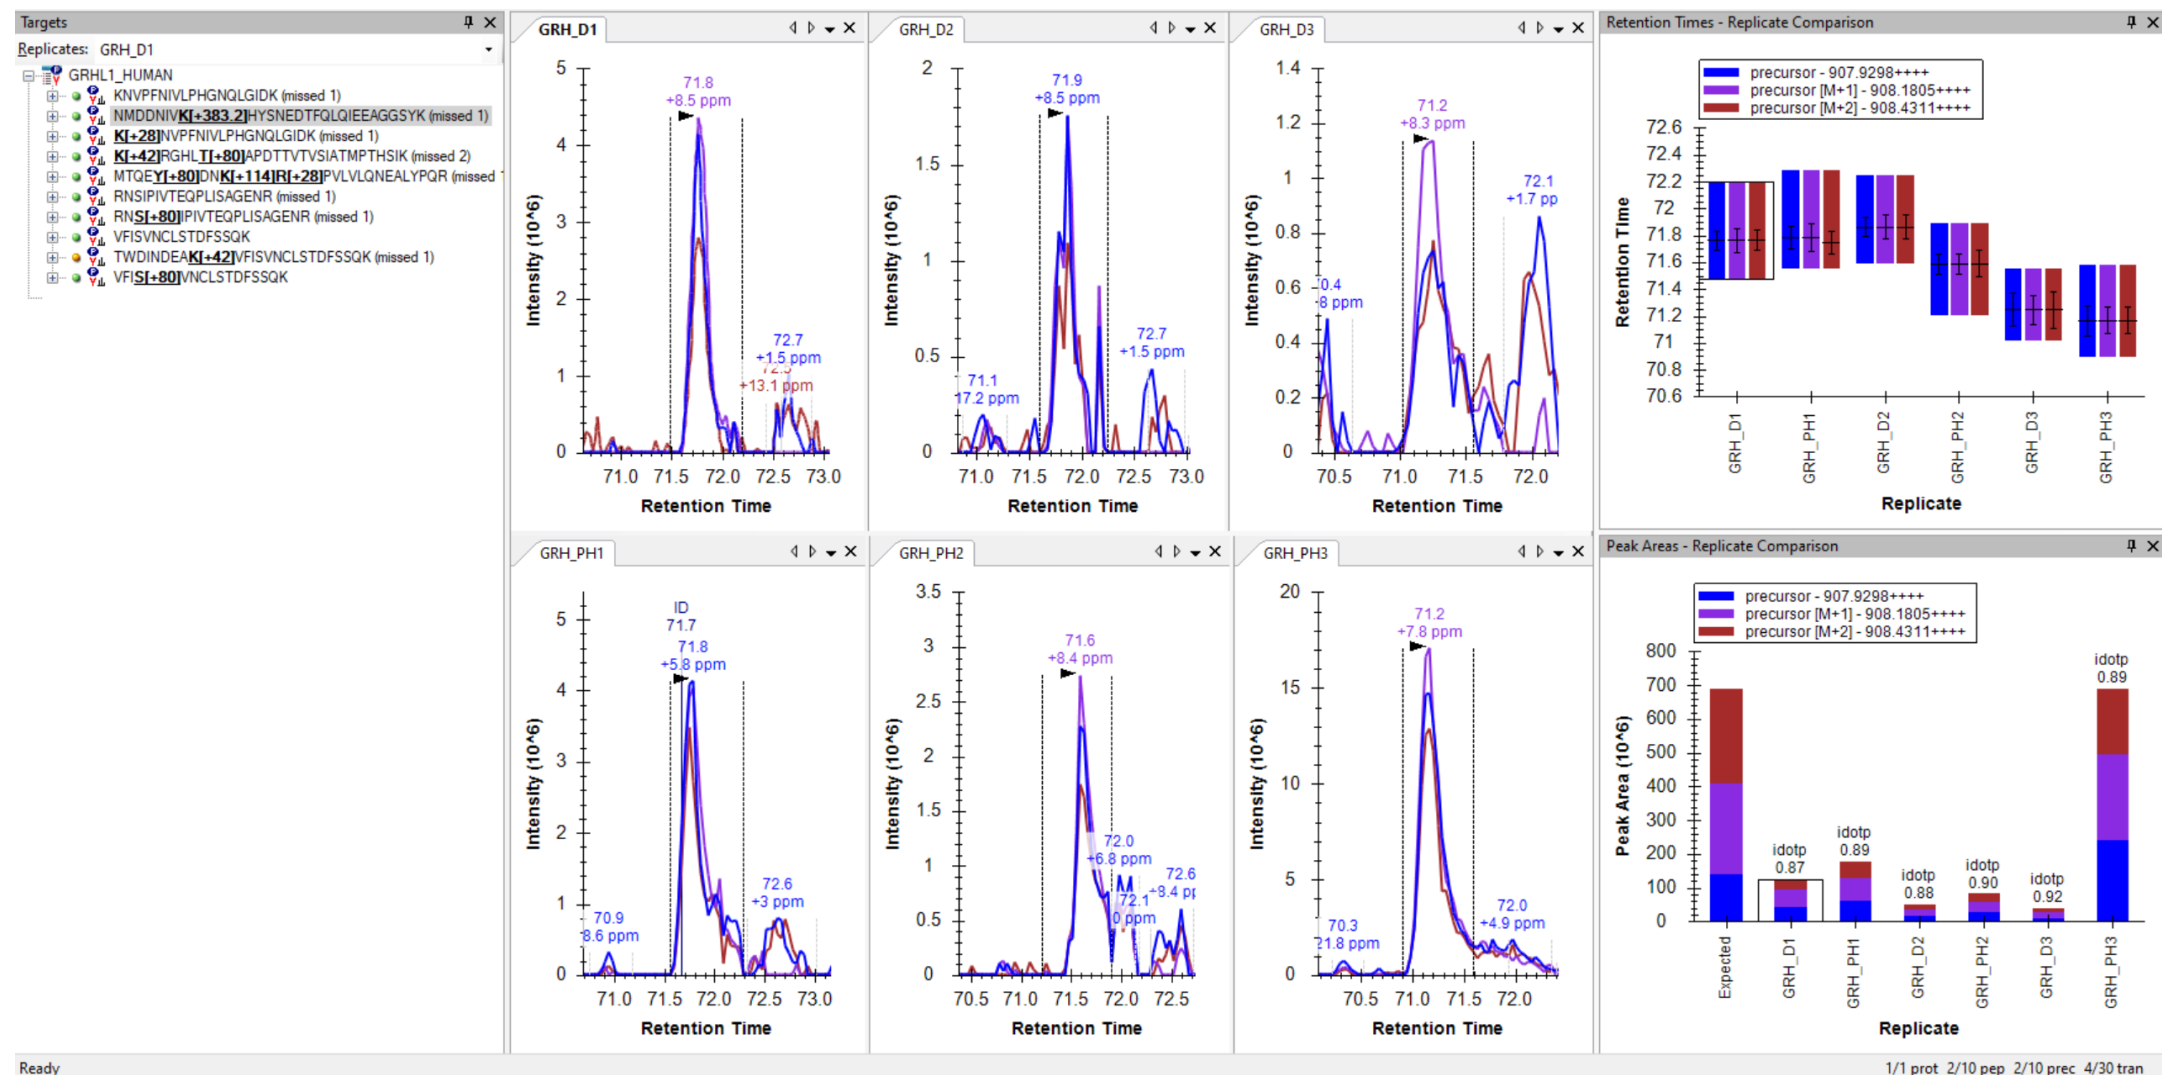

Supplement: 41467_2021_27732_MOESM10_ESM.pdf [file 41467_2021_27732_MOESM10_ESM.pdf]
