# Supplementary material for: Grainyhead 1 acts as a drug-inducible conserved transcriptional regulator linked to insulin signaling and lifespan
Source: PubMed Central journal article supplement (PMC8748497; doi:10.1038/s41467-021-27732-4), 2022-01-10

# Supplementary Data 6. Annotated MS/MS spectra of GRHL1 post-translational modifications associated with papaverine treatment.

GRHL1 arginine 9 - dimethylation

MTQEY(+79.97)DNK(+114.04)R(+28.03)PVLVLQNEALY PQR.R

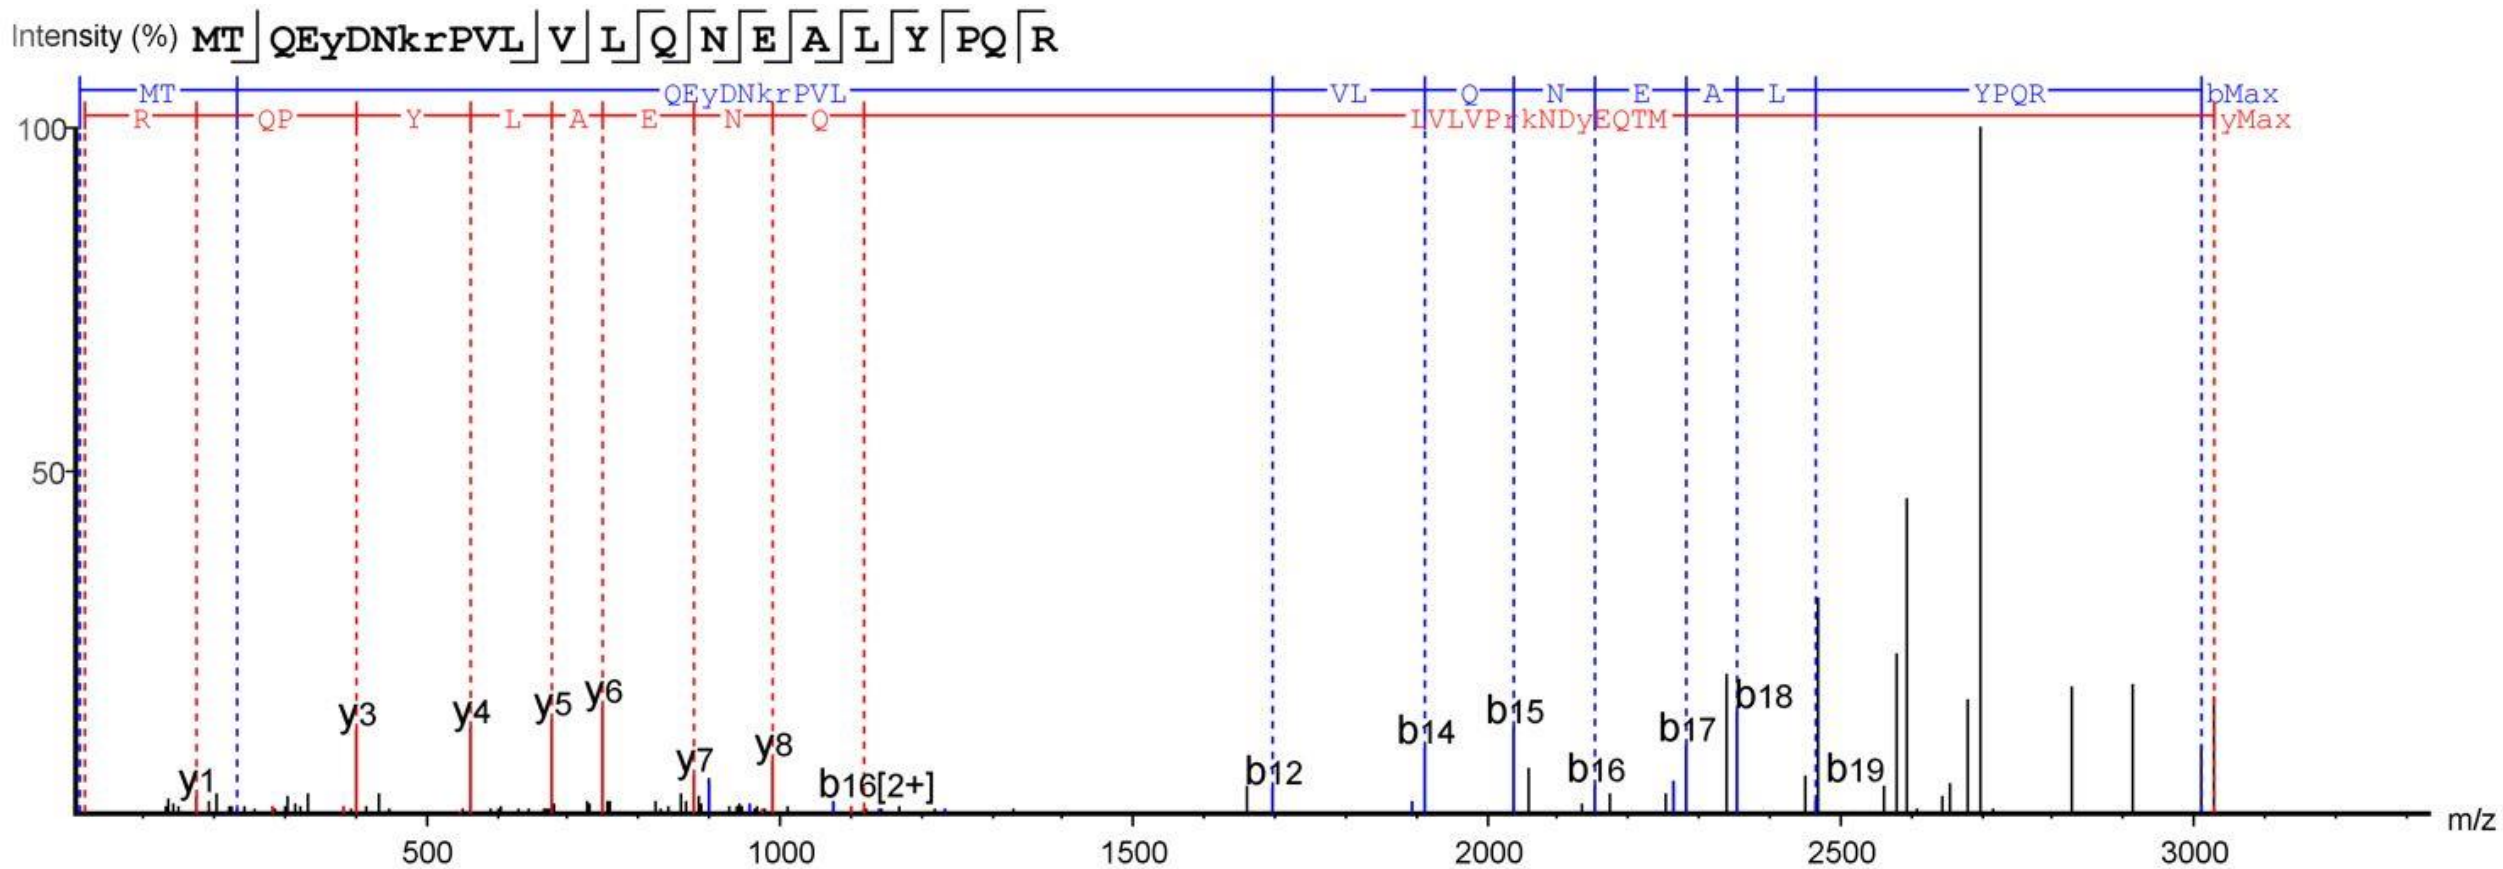

# Supplementary Data 6. Annotated MS/MS spectra of GRHL1 post-translational modifications associated with papaverine treatment.

GRHL1 serine 95 - phosphorylation  
K.RNS(+79.97)IPIVTEQPLISAGENR.V

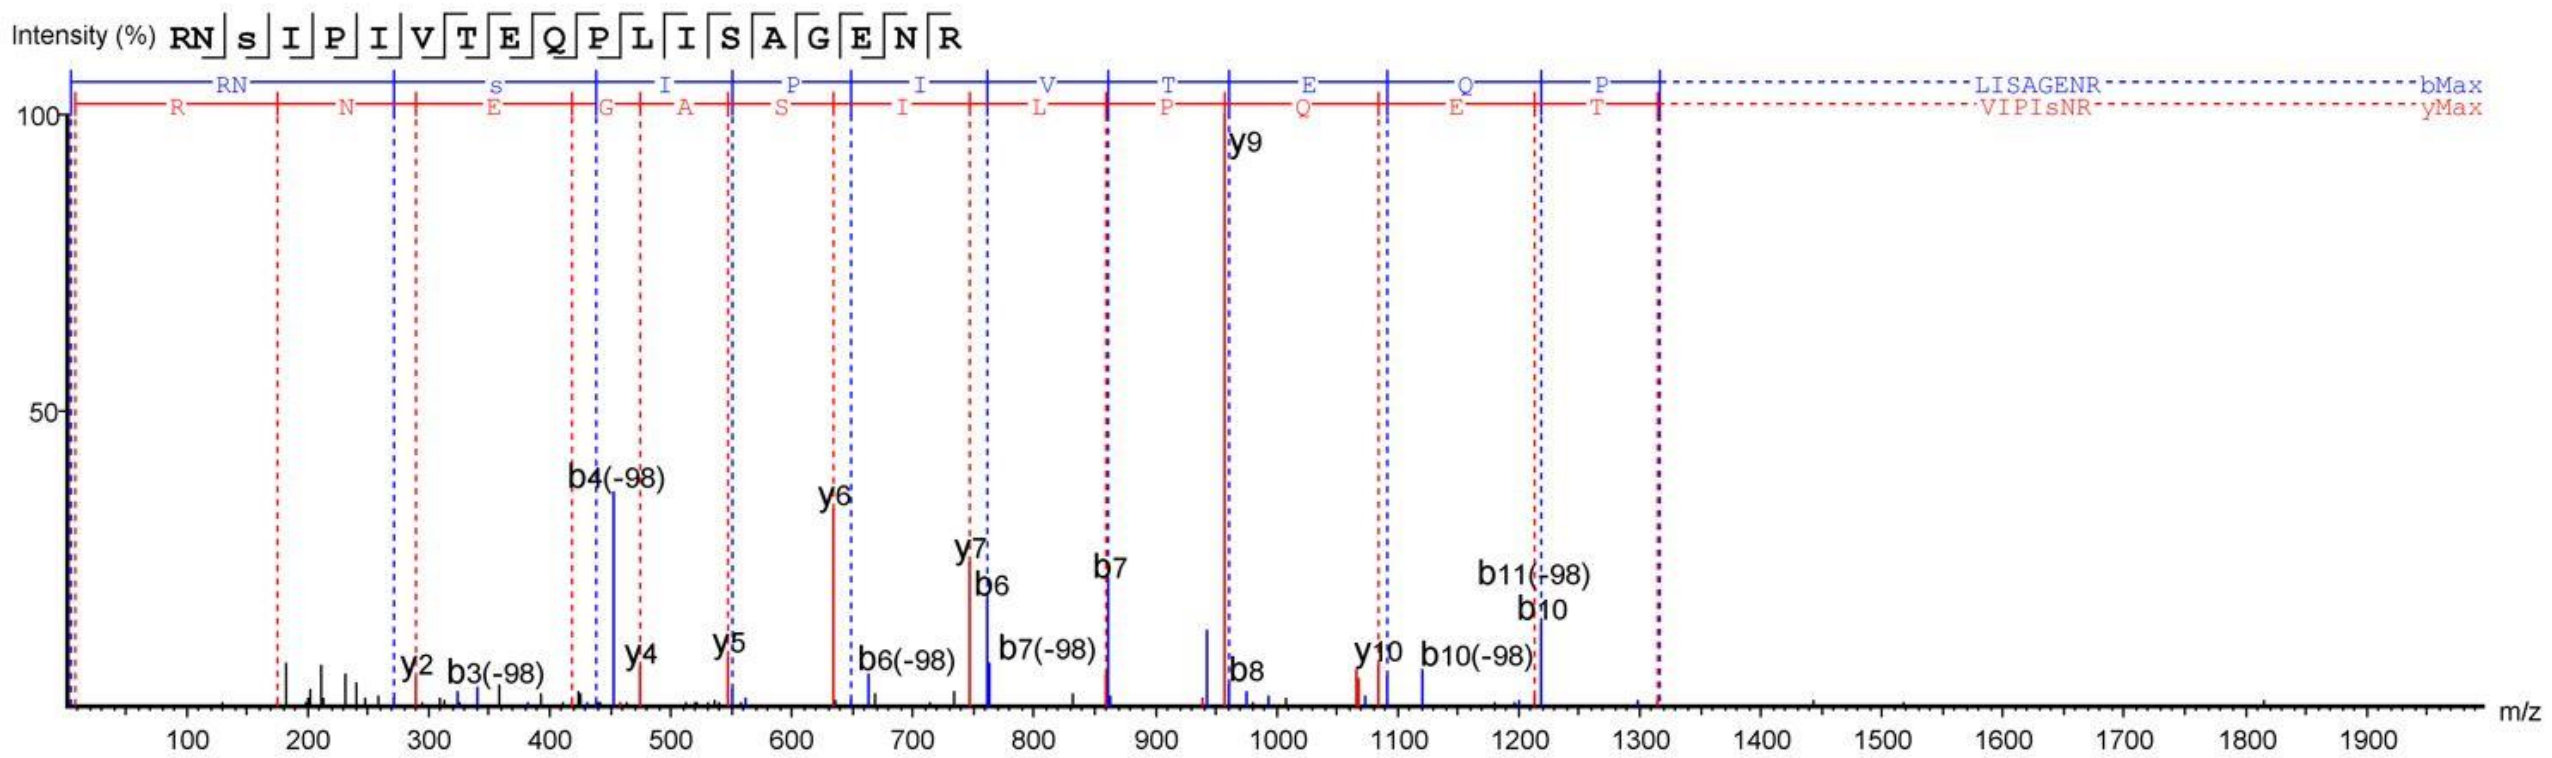

# Supplementary Data 6. Annotated MS/MS spectra of GRHL1 post-translational modifications associated with papaverine treatment.

GRHL1 lysine 116 - dimethylation  
L.K(+28.03)NVPFNIVLPHGNQLGIDK.R

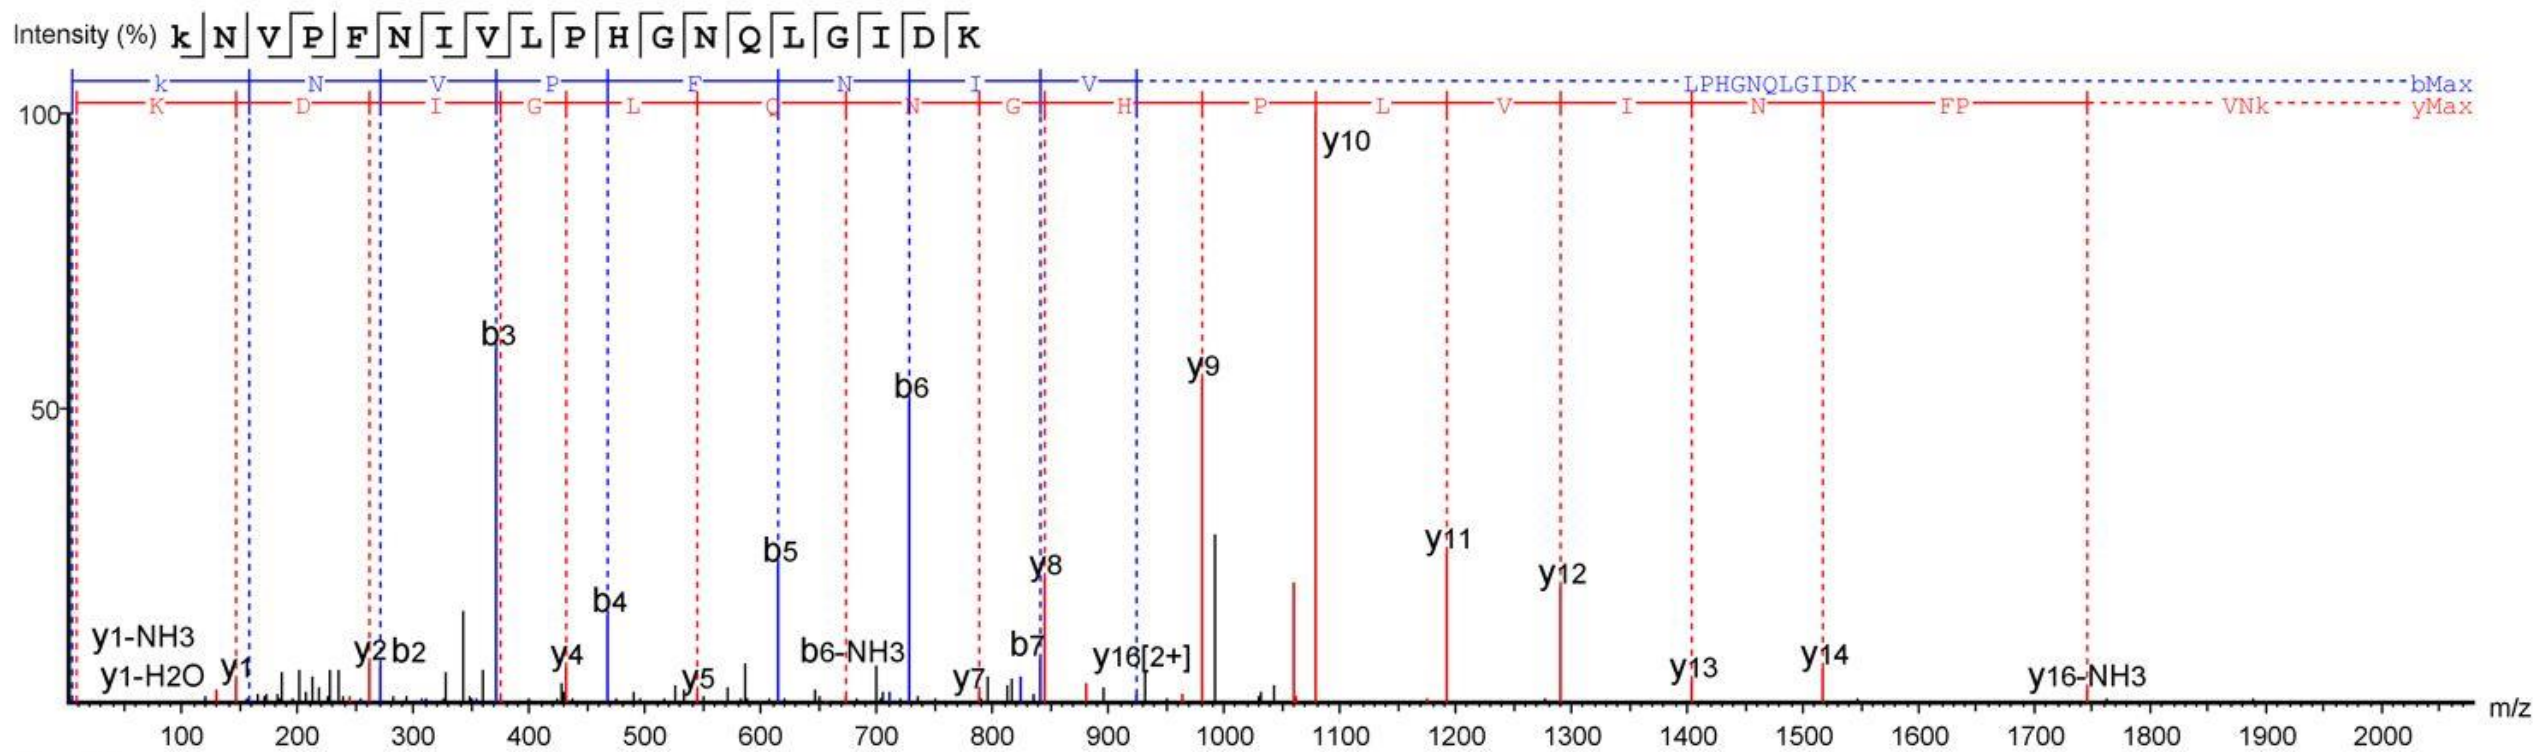

# Supplementary Data 6. Annotated MS/MS spectra of GRHL1 post-translational modifications associated with papaverine treatment.

GRHL1 threonine 139 - phosphorylation

D.K(+42.01)RGHLT(+79.97)APDTTVTVSIATMPHTHSIK.T

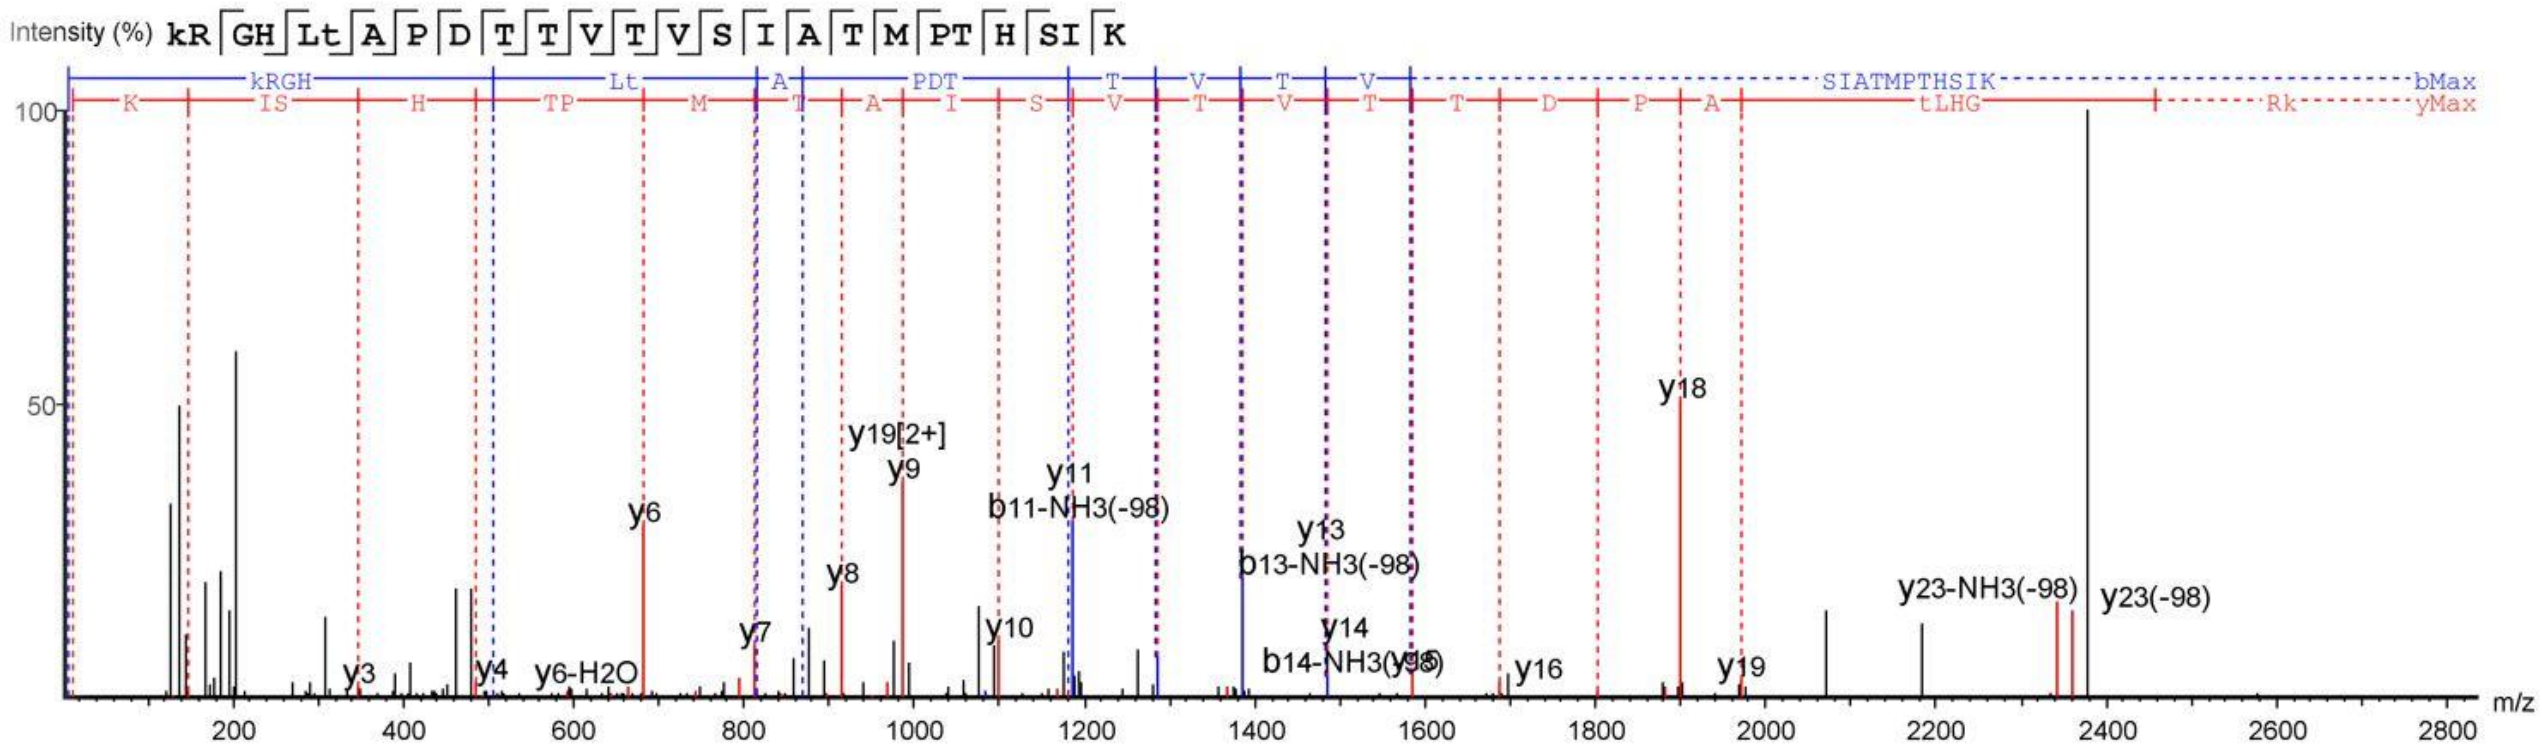

# Supplementary Data 6. Annotated MS/MS spectra of GRHL1 post-translational modifications associated with papaverine treatment.

GRHL1 lysine 370 - acetylation

F.TWDINDEAK(+42.01)VFISVNCLSTDFSSQK.G

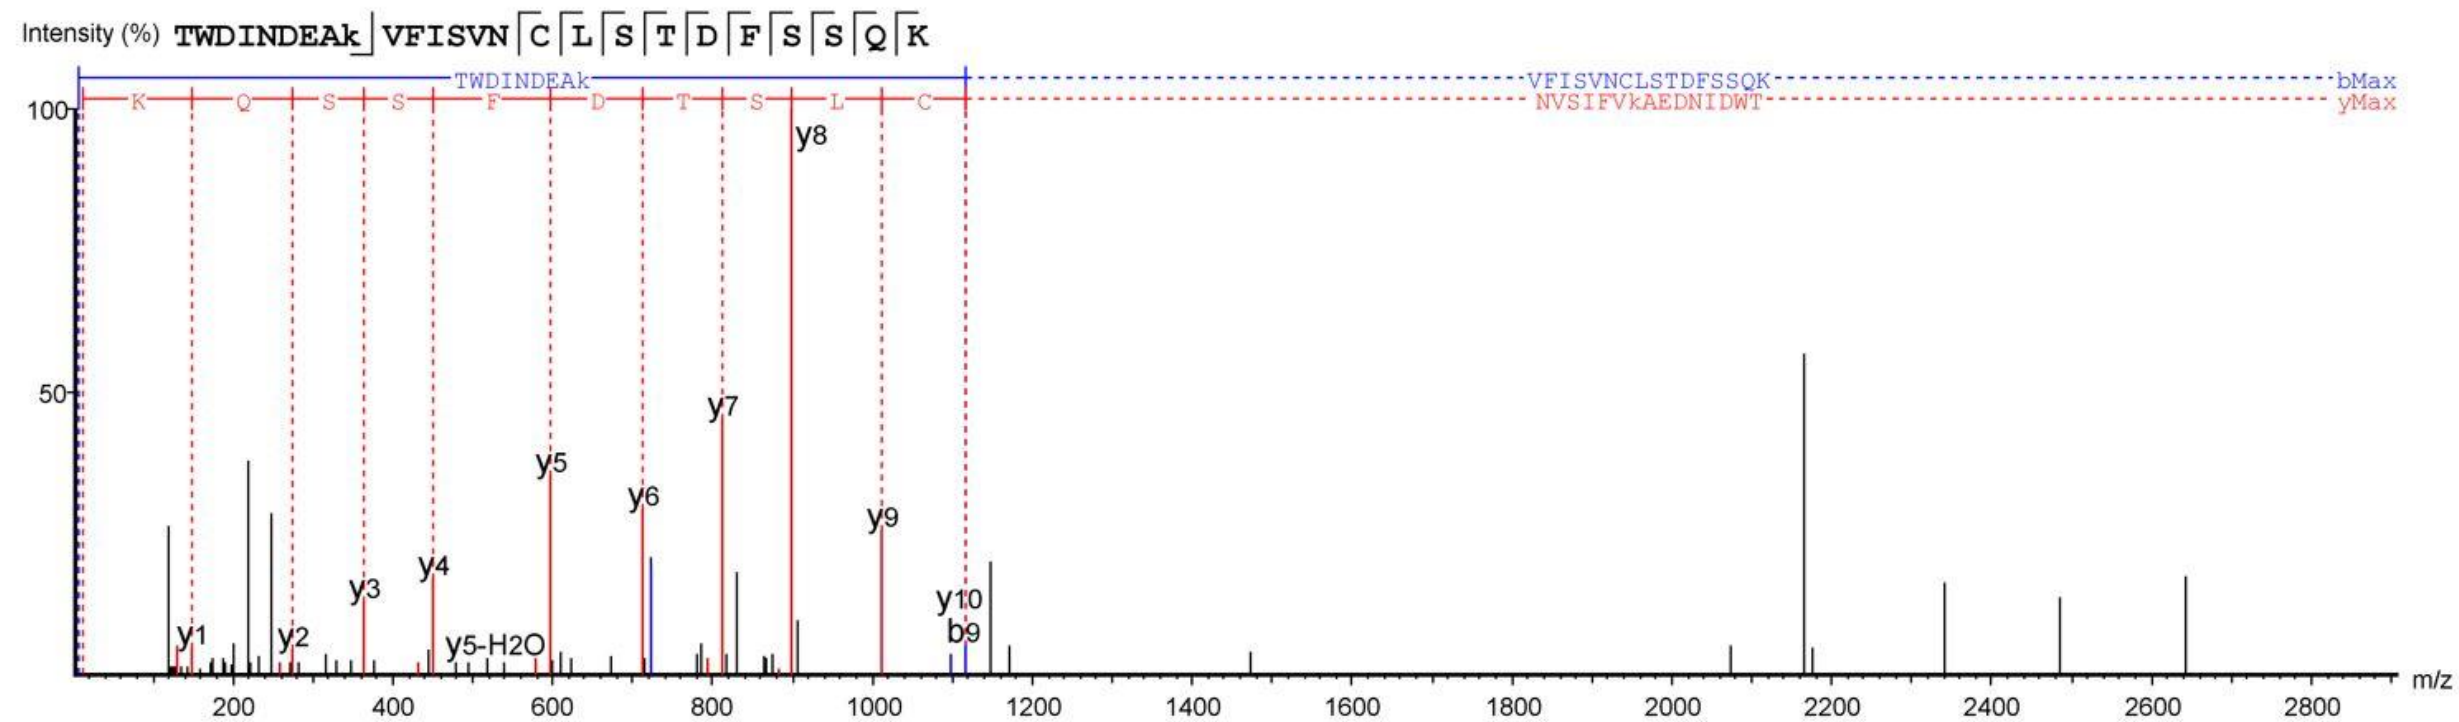

# Supplementary Data 6. Annotated MS/MS spectra of GRHL1 post-translational modifications associated with papaverine treatment.

GRHL1 serine 374 - phosphorylation  
K.VFIS(+79.97)VNCLSTDFSSQK.G

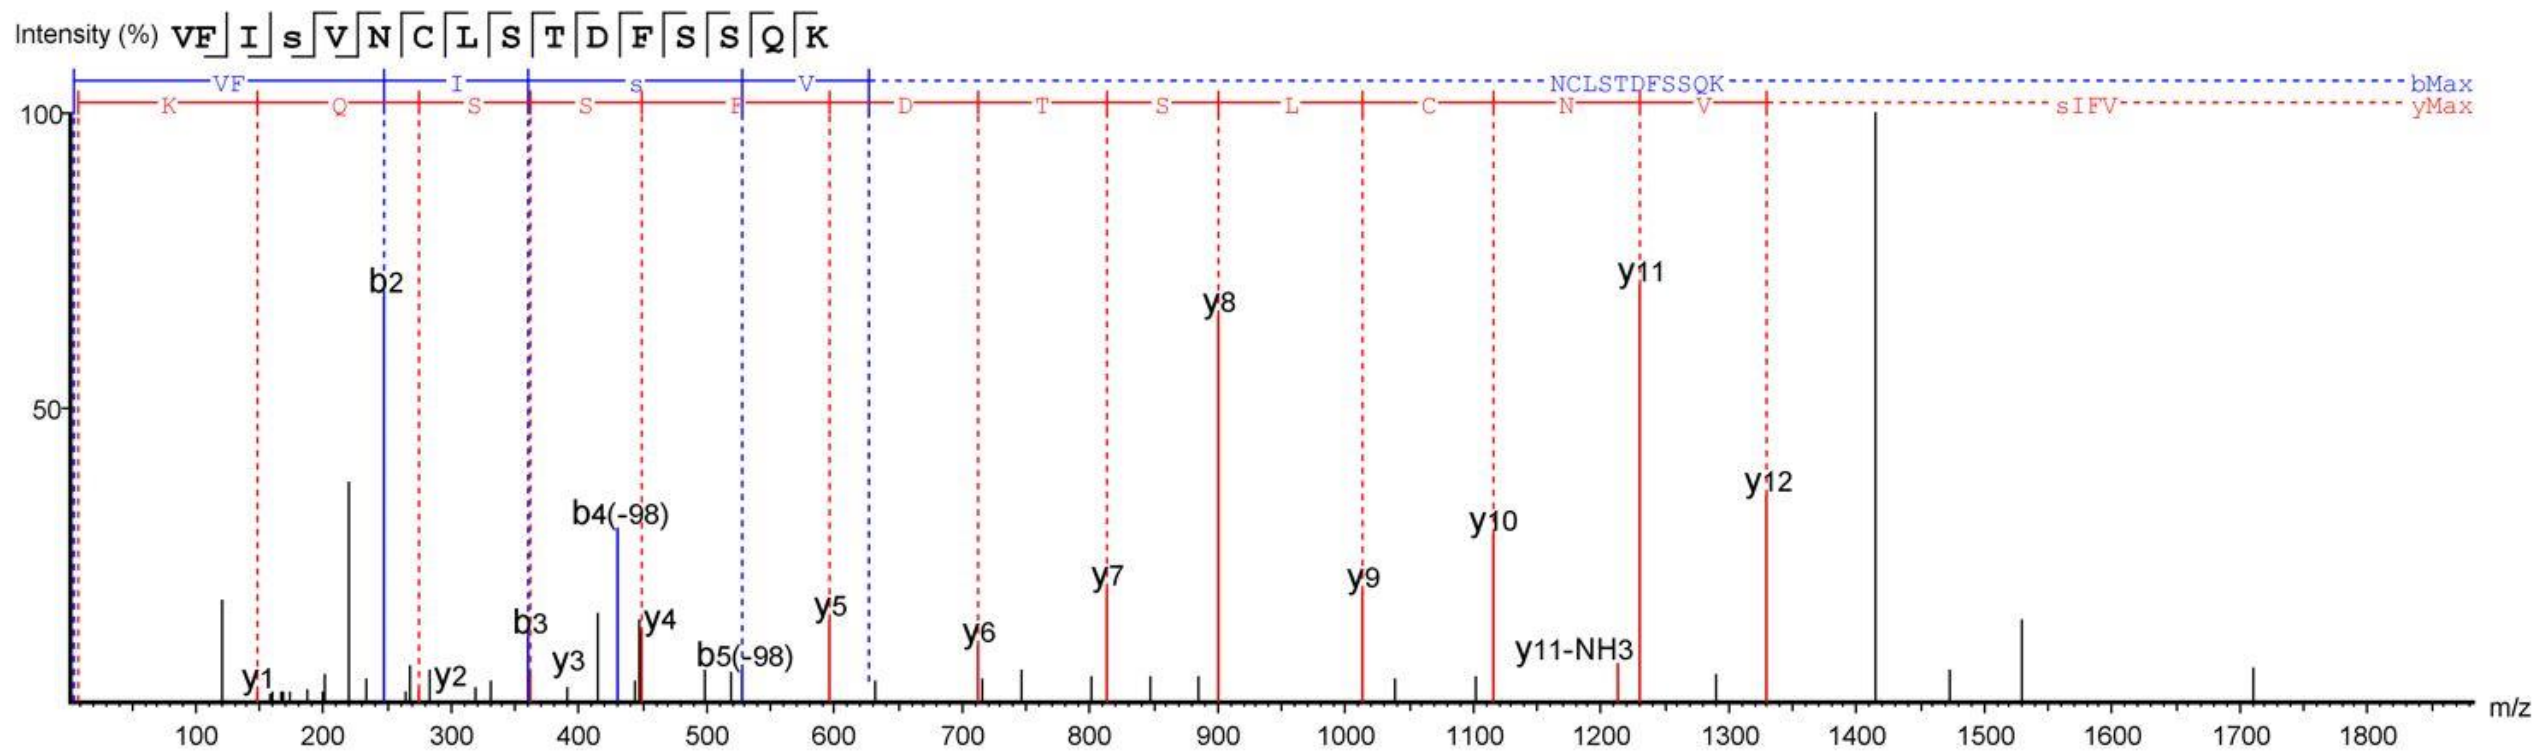

# Supplementary Data 6. Annotated MS/MS spectra of GRHL1 post-translational modifications associated with papaverine treatment.

GRHL1 lysine 592 - ubiquitylation

V.NMDDNIVK(+383.23)HYSNEDTFQLQIEEAGGSYK.L

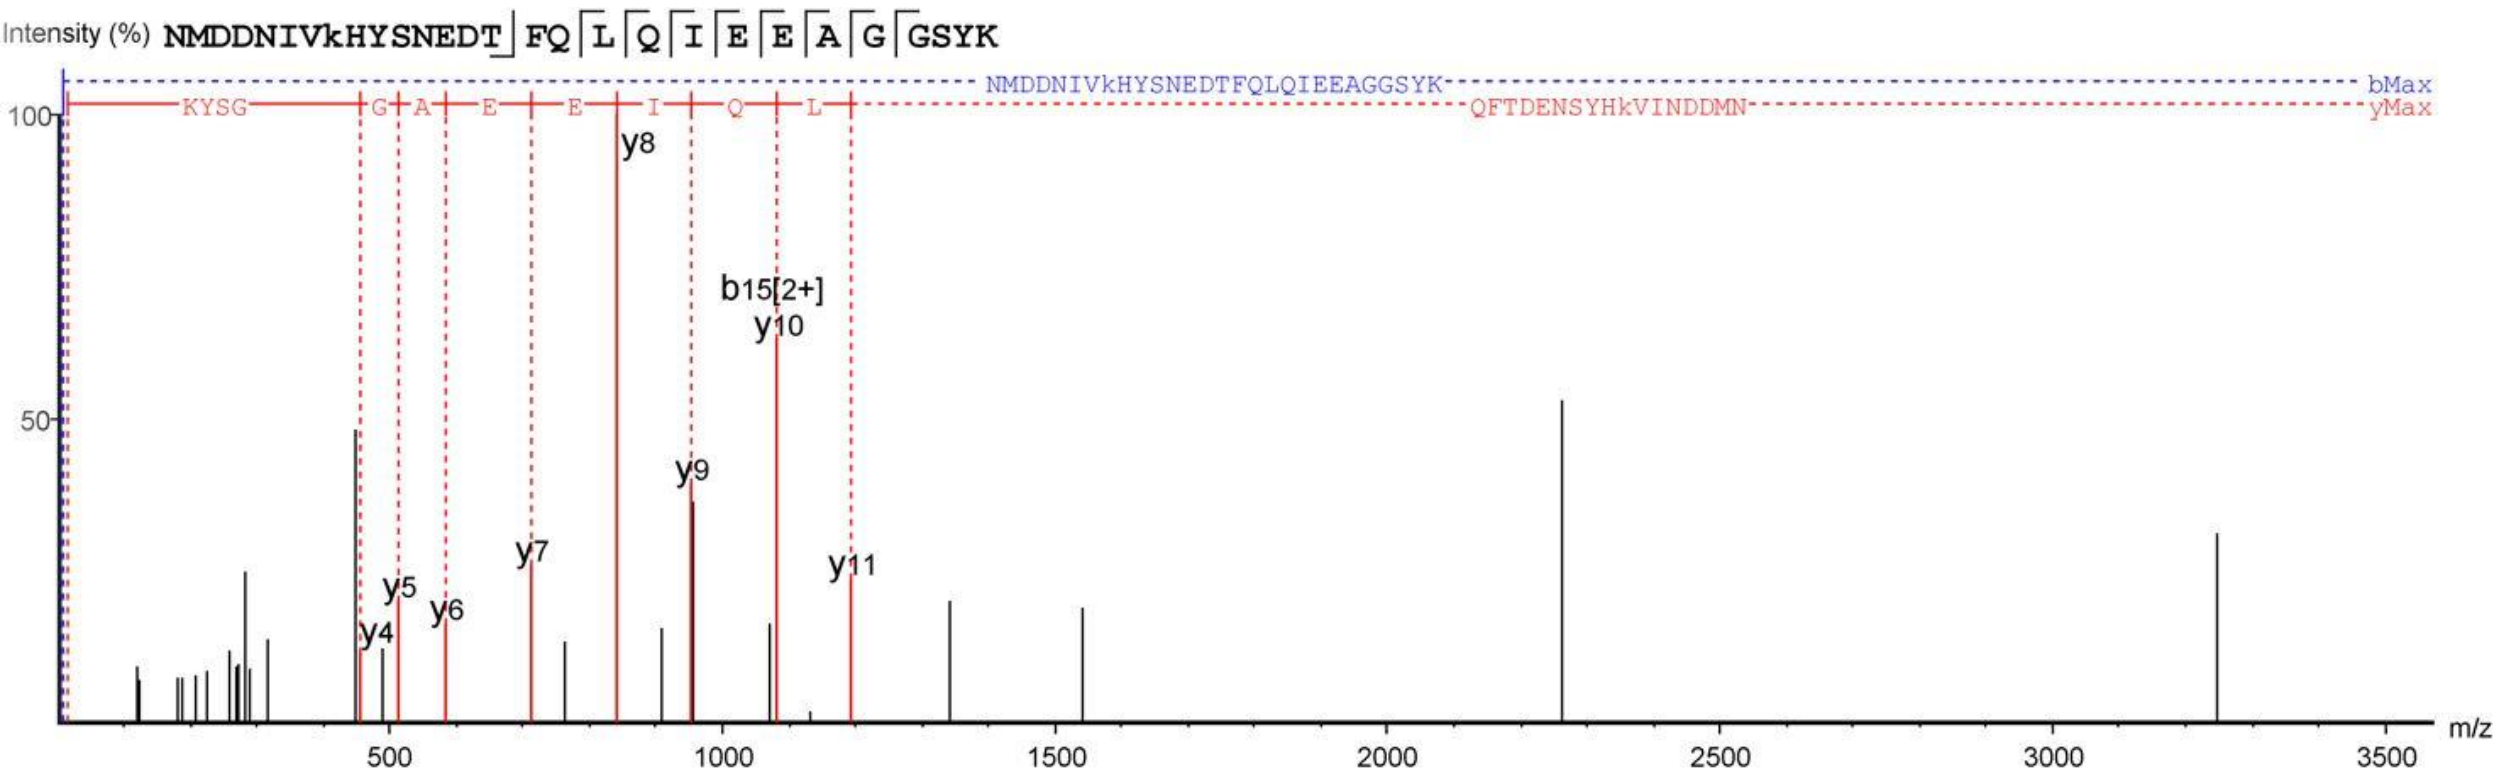

Supplement: 41467_2021_27732_MOESM9_ESM.pdf [file 41467_2021_27732_MOESM9_ESM.pdf]
